# Supplementary material for: New Pyrazolo-Benzimidazole Mannich Bases with Antimicrobial and Antibiofilm Activities
Source: MDPI journal article supplement (doi:10.3390/antibiotics11081094), 2022-08-12

N-[(1*H*-3,5-dimethylpyrazol-1-yl)methyl]1-amino-1*H*-benzimidazole (**5a**)

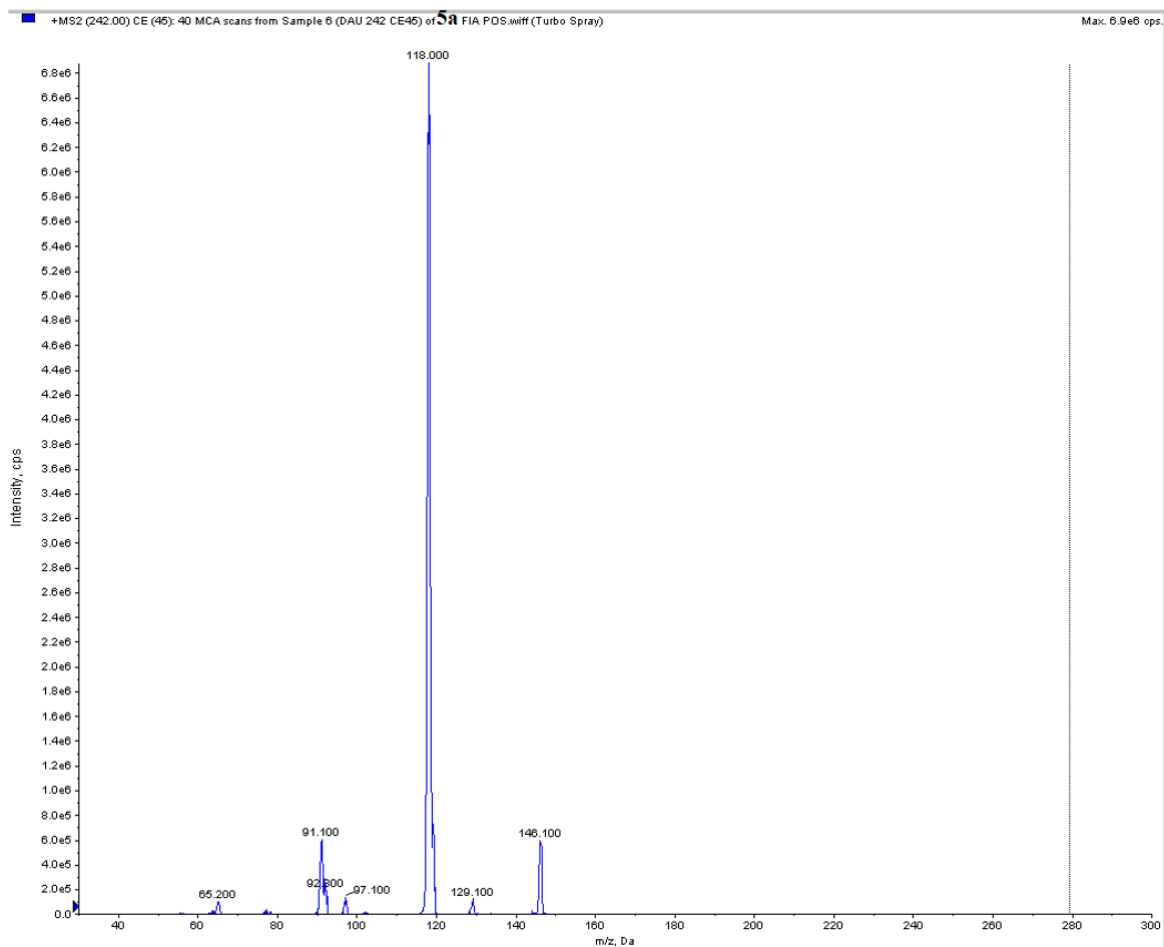

N-[(1*H*-3,5-dimethyl-4-nitropyrazol-1-yl)methyl]1-amino-1*H*-benzimidazole (**5b**)

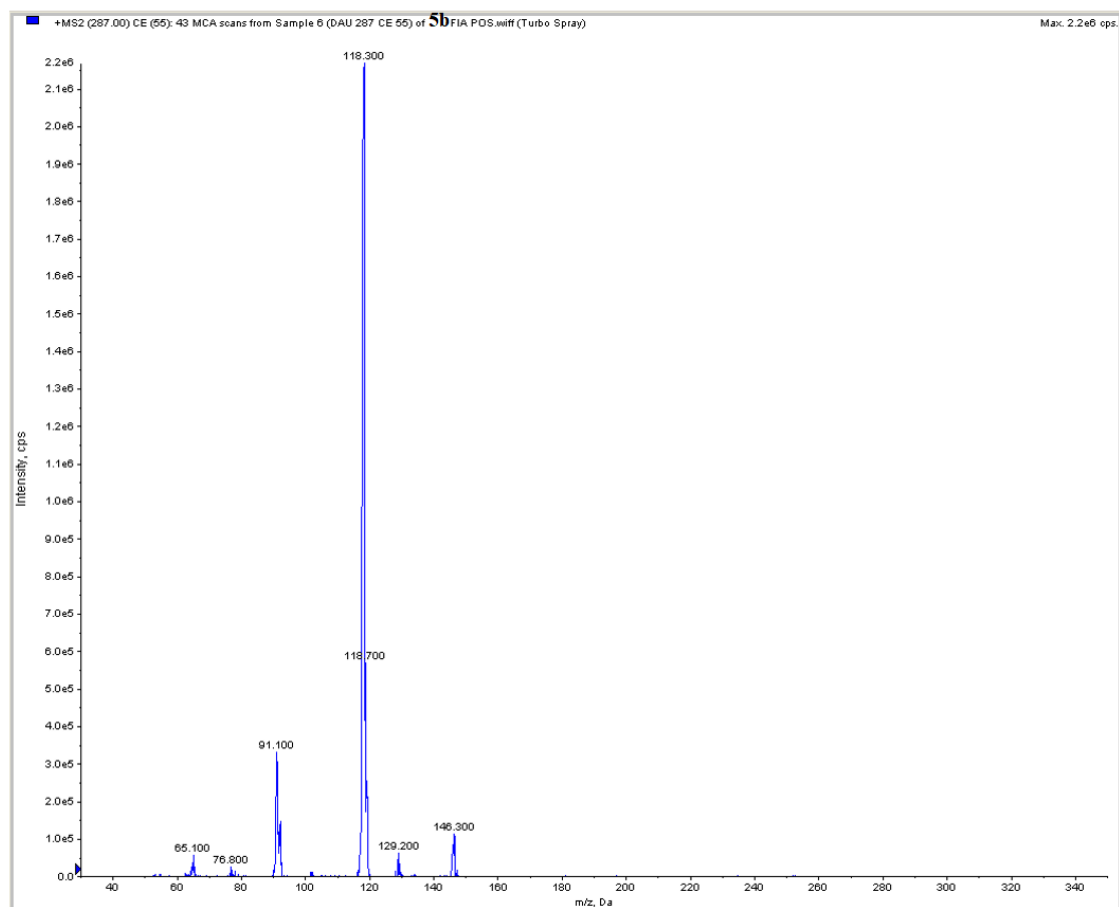

N-[(1*H*-3,5-dimethyl-4-iodopyrazol-1*yl*)methyl]1-amino-1*H*-benzimidazole (**5c**)

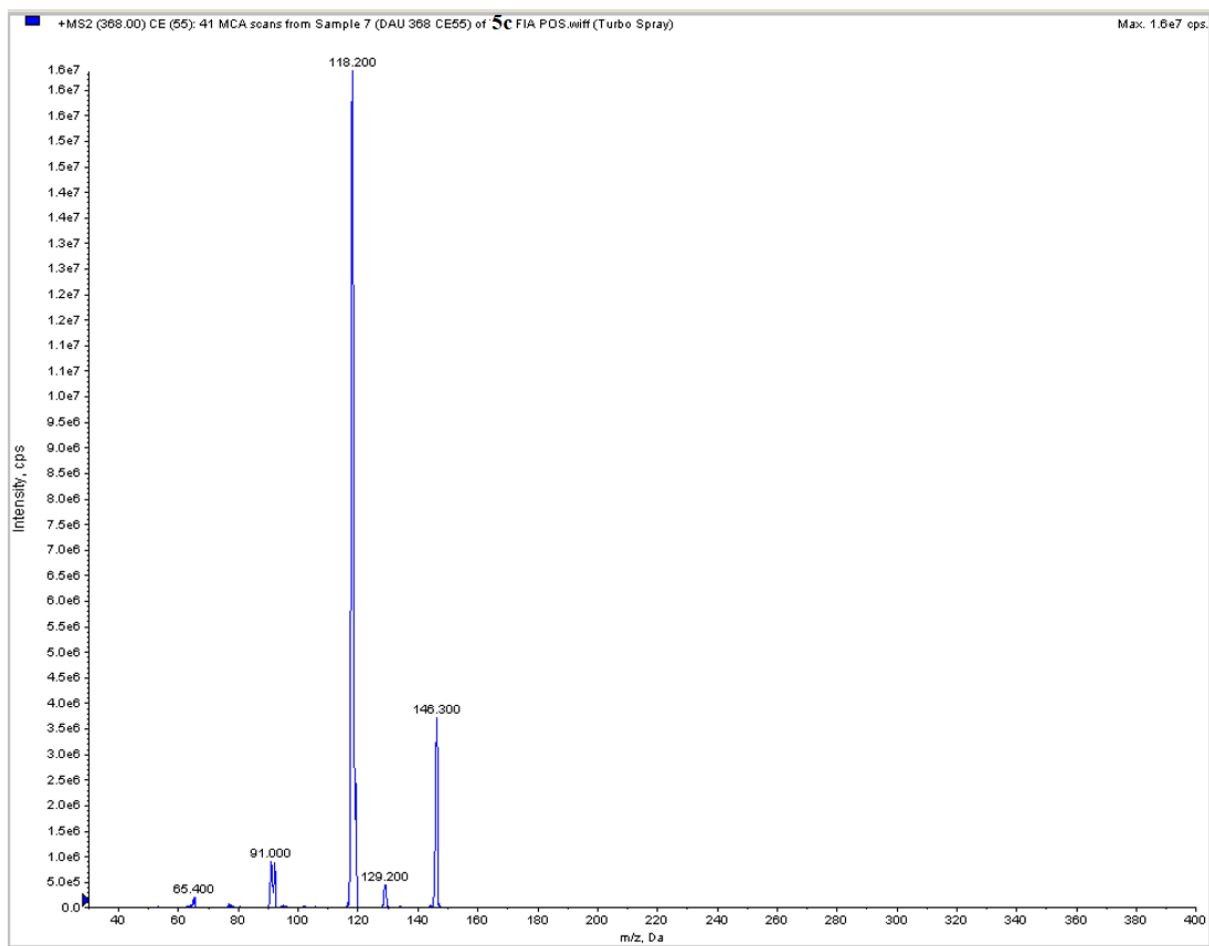

N-[(1*H*-pyrazol-1-yl)methyl]1-amino-2-methyl-1*H*-benzimidazole (**5d**)

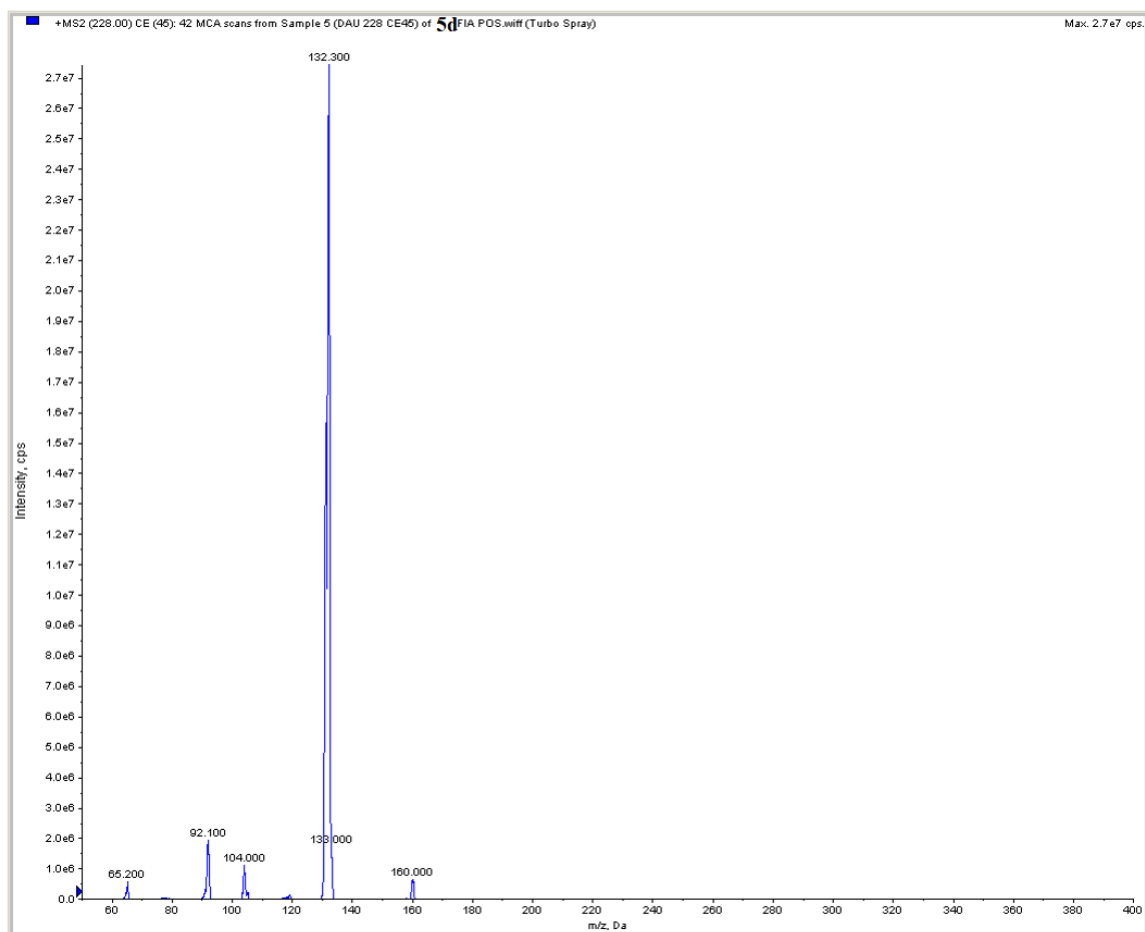

N-[(1*H*-3,5-dimethyl-pyrazol-1-yl)methyl]-1-amino-2-methyl-1*H*-benzimidazole (**5e**)

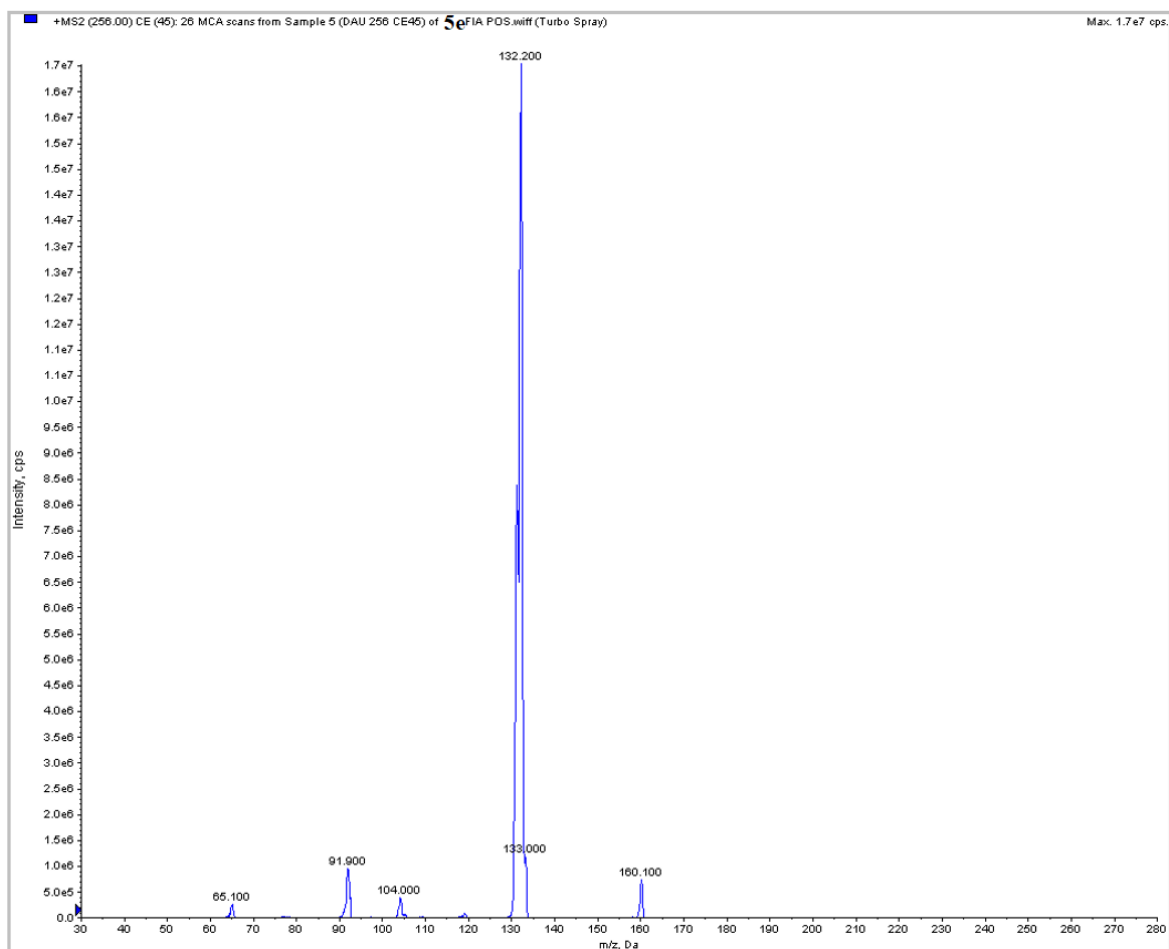

N-[(1*H*-3,5-dimethyl-4-nitropyrazol-1-yl)methyl]-1-amino-2-methyl-1*H*-benzimidazole  
(5*f*)

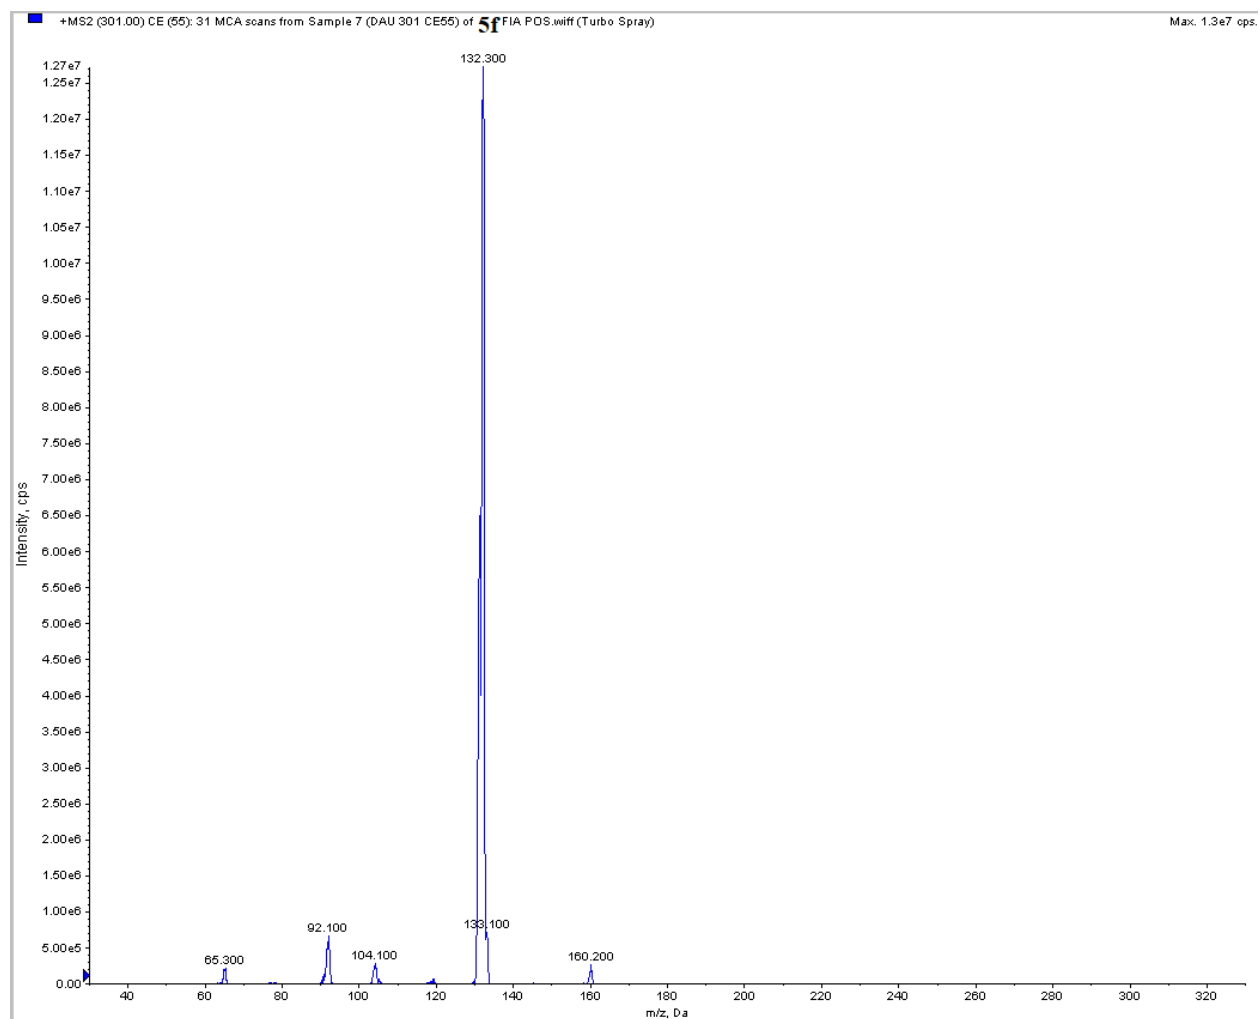

N-[(1*H*-3,5-dimethyl-4-iodopyrazol-1yl)methyl]-1-amino-2-methyl-1*H*-benzimidazole  
(5*g*)

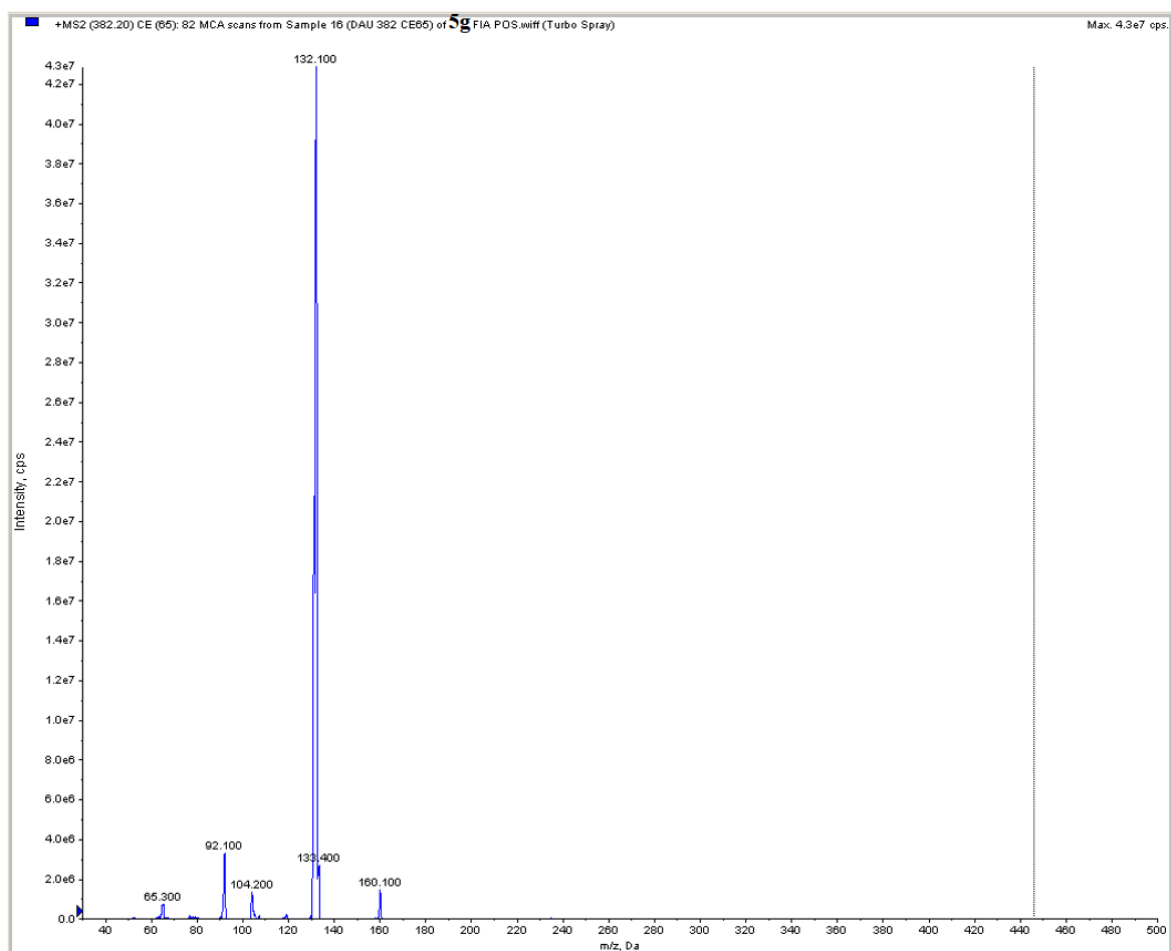

Instrument Bruker FOURIER 300 MHz (UnivBucuresti)  
 User Ch. Zalaru  
 Operator CS AM  
 Registry No. 4953  
 Sample Changer No. 6  
 Sample Name 5a-Z87  
 @H1-DUL-01 CDC13 {D:\CCO\TCaproiu} ICON-NMR-Lab 6

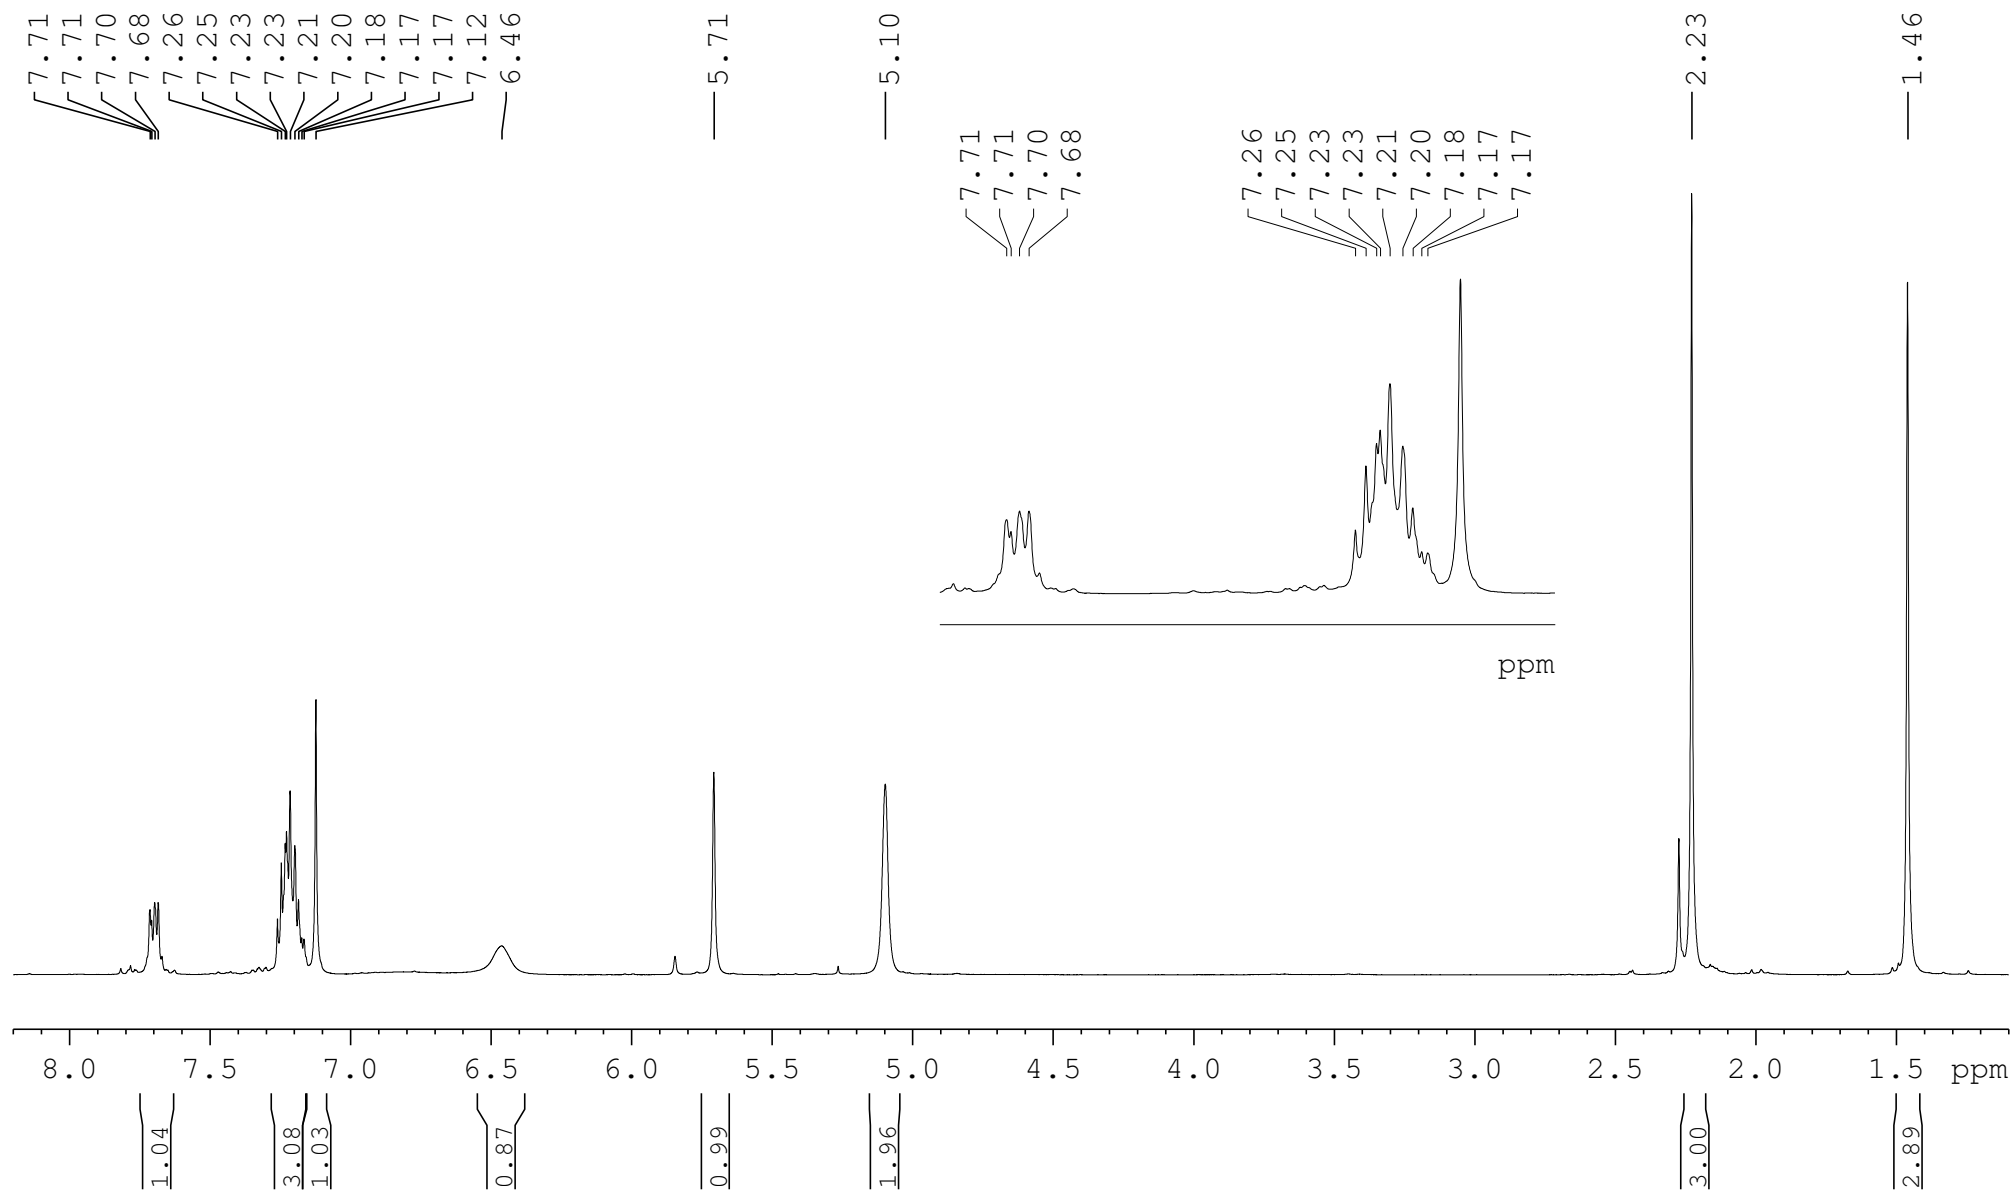



Instrument Bruker FOURIER 300 MHz (UnivBucuresti)  
User Ch. Zalaru  
Operator CS AM  
Registry No. 4953  
Sample Changer No. 6  
Sample Name 5a-Z87  
@C13-CPD-DUL-01 CDC13 {D:\CCO\TCaproiu} ICON-NMR-Lab 6

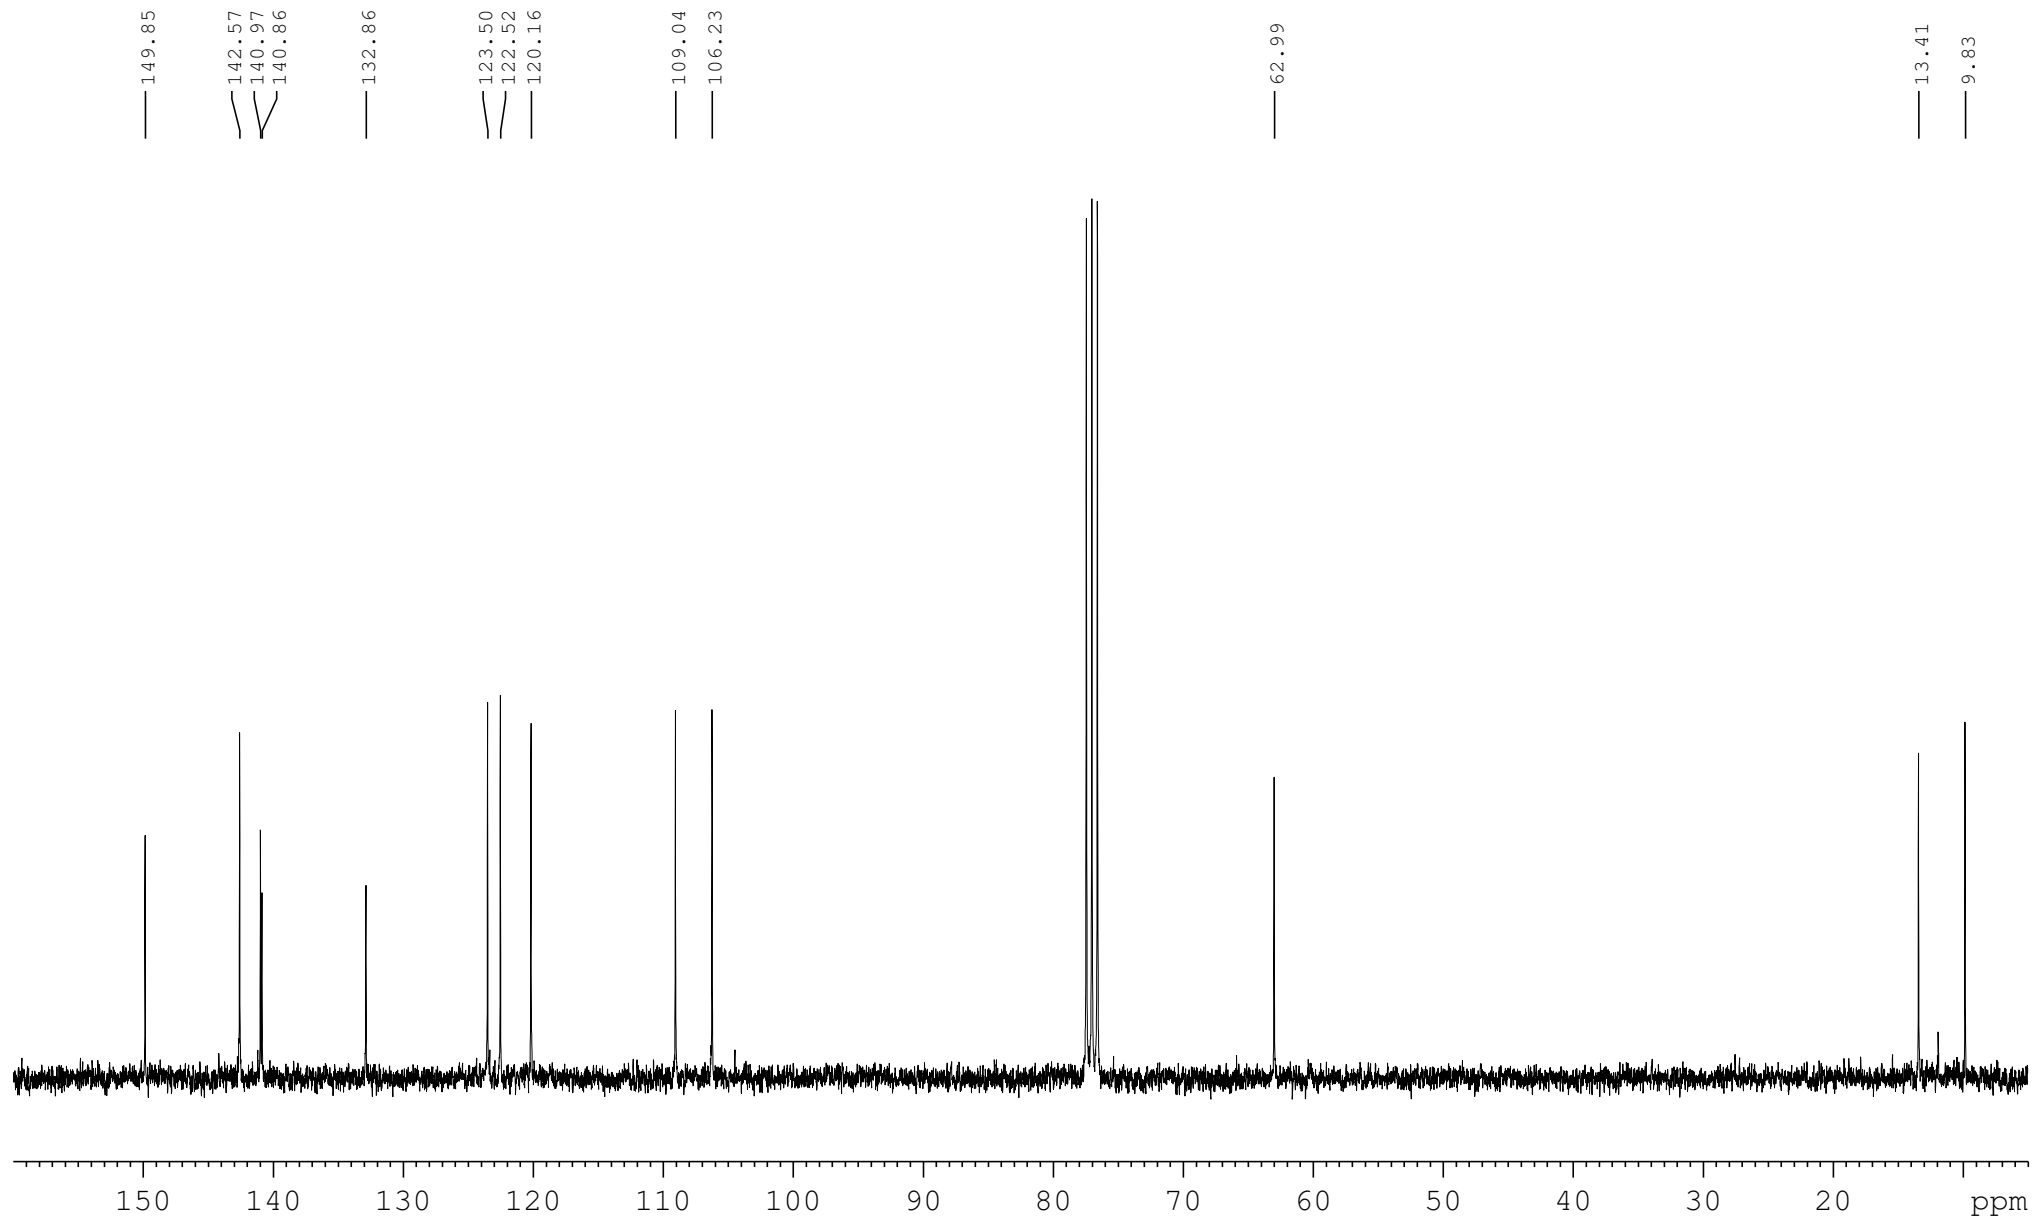

Sample Name:

5b-ZALARU

Data Collected on:

nmr300-mercury300

Archive directory:

/home/vnmr1/vnmrsys/data/07-Analyze/CosticaDraghici

Sample directory:

5b-ZALARU\_22-07-2022

FidFile: 5b-ZALARU-CARBON\_01

Pulse Sequence: CARBON (s2pul)

Solvent: dmsd

Data collected on: Jul 22 2022

OpenVnmr1

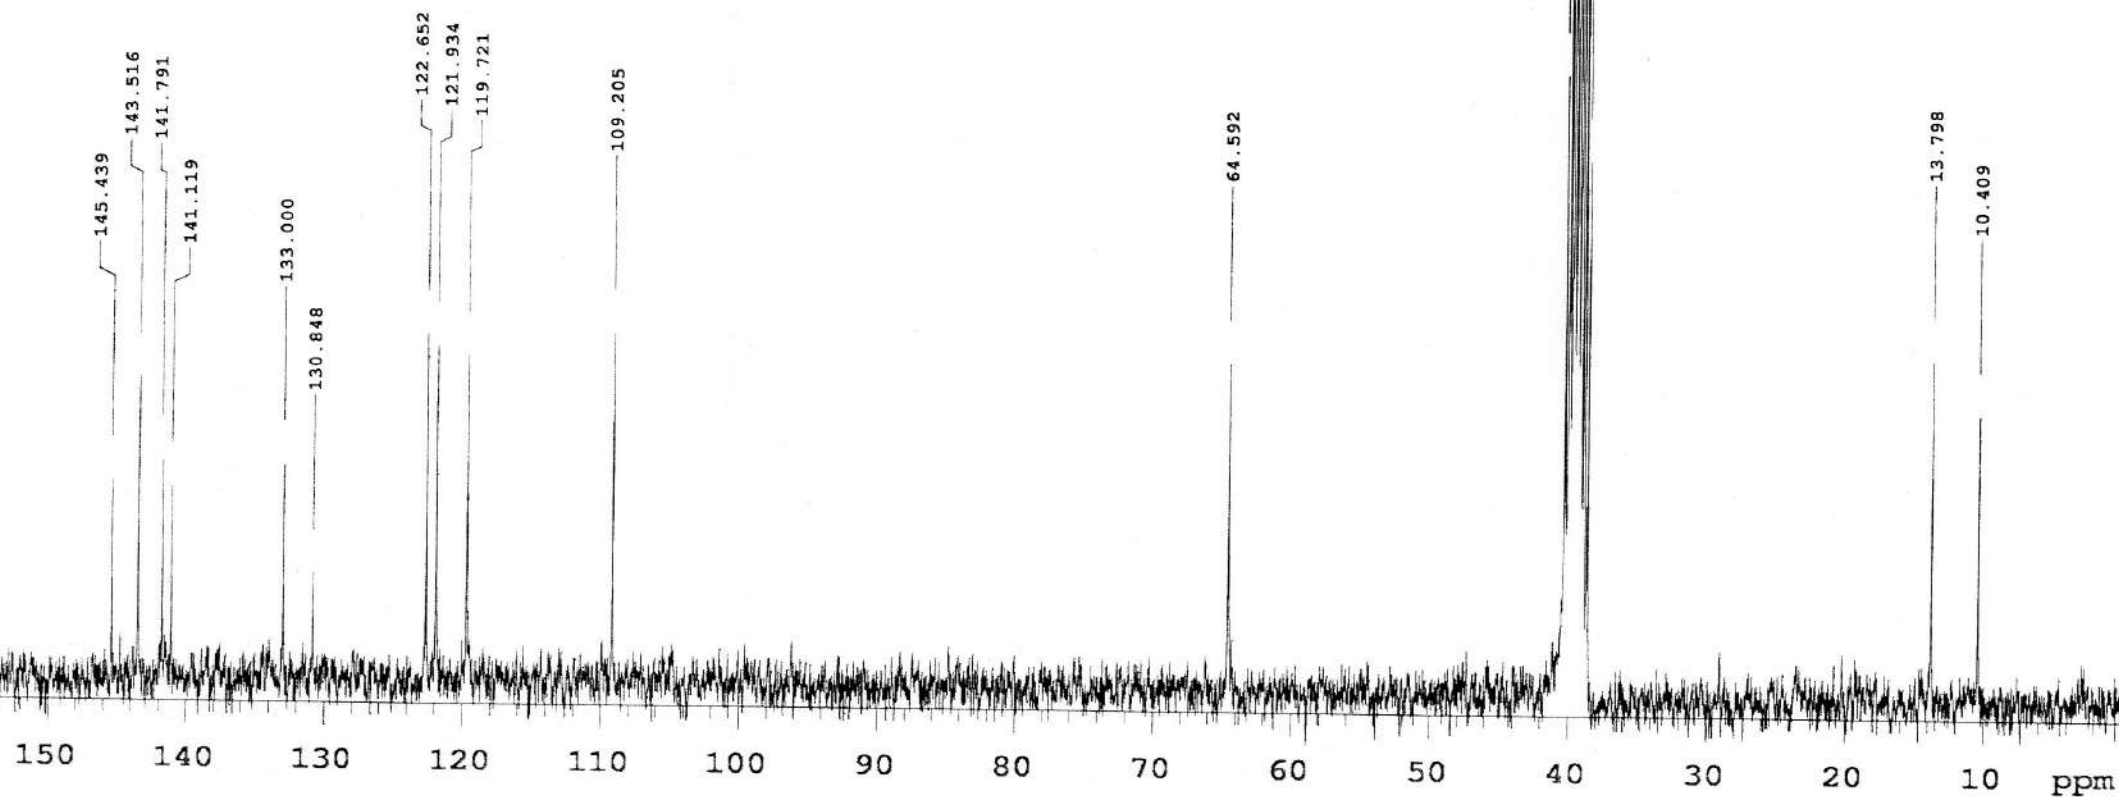

Sample Name:  
5b-ZALARU  
Data Collected on:  
nmr300-mercury300  
Archive directory:

Sample directory:

FidFile: PROTON

Pulse Sequence: PROTON (s2pul)  
Solvent: dmsd  
Data collected on: Jul 22 2022

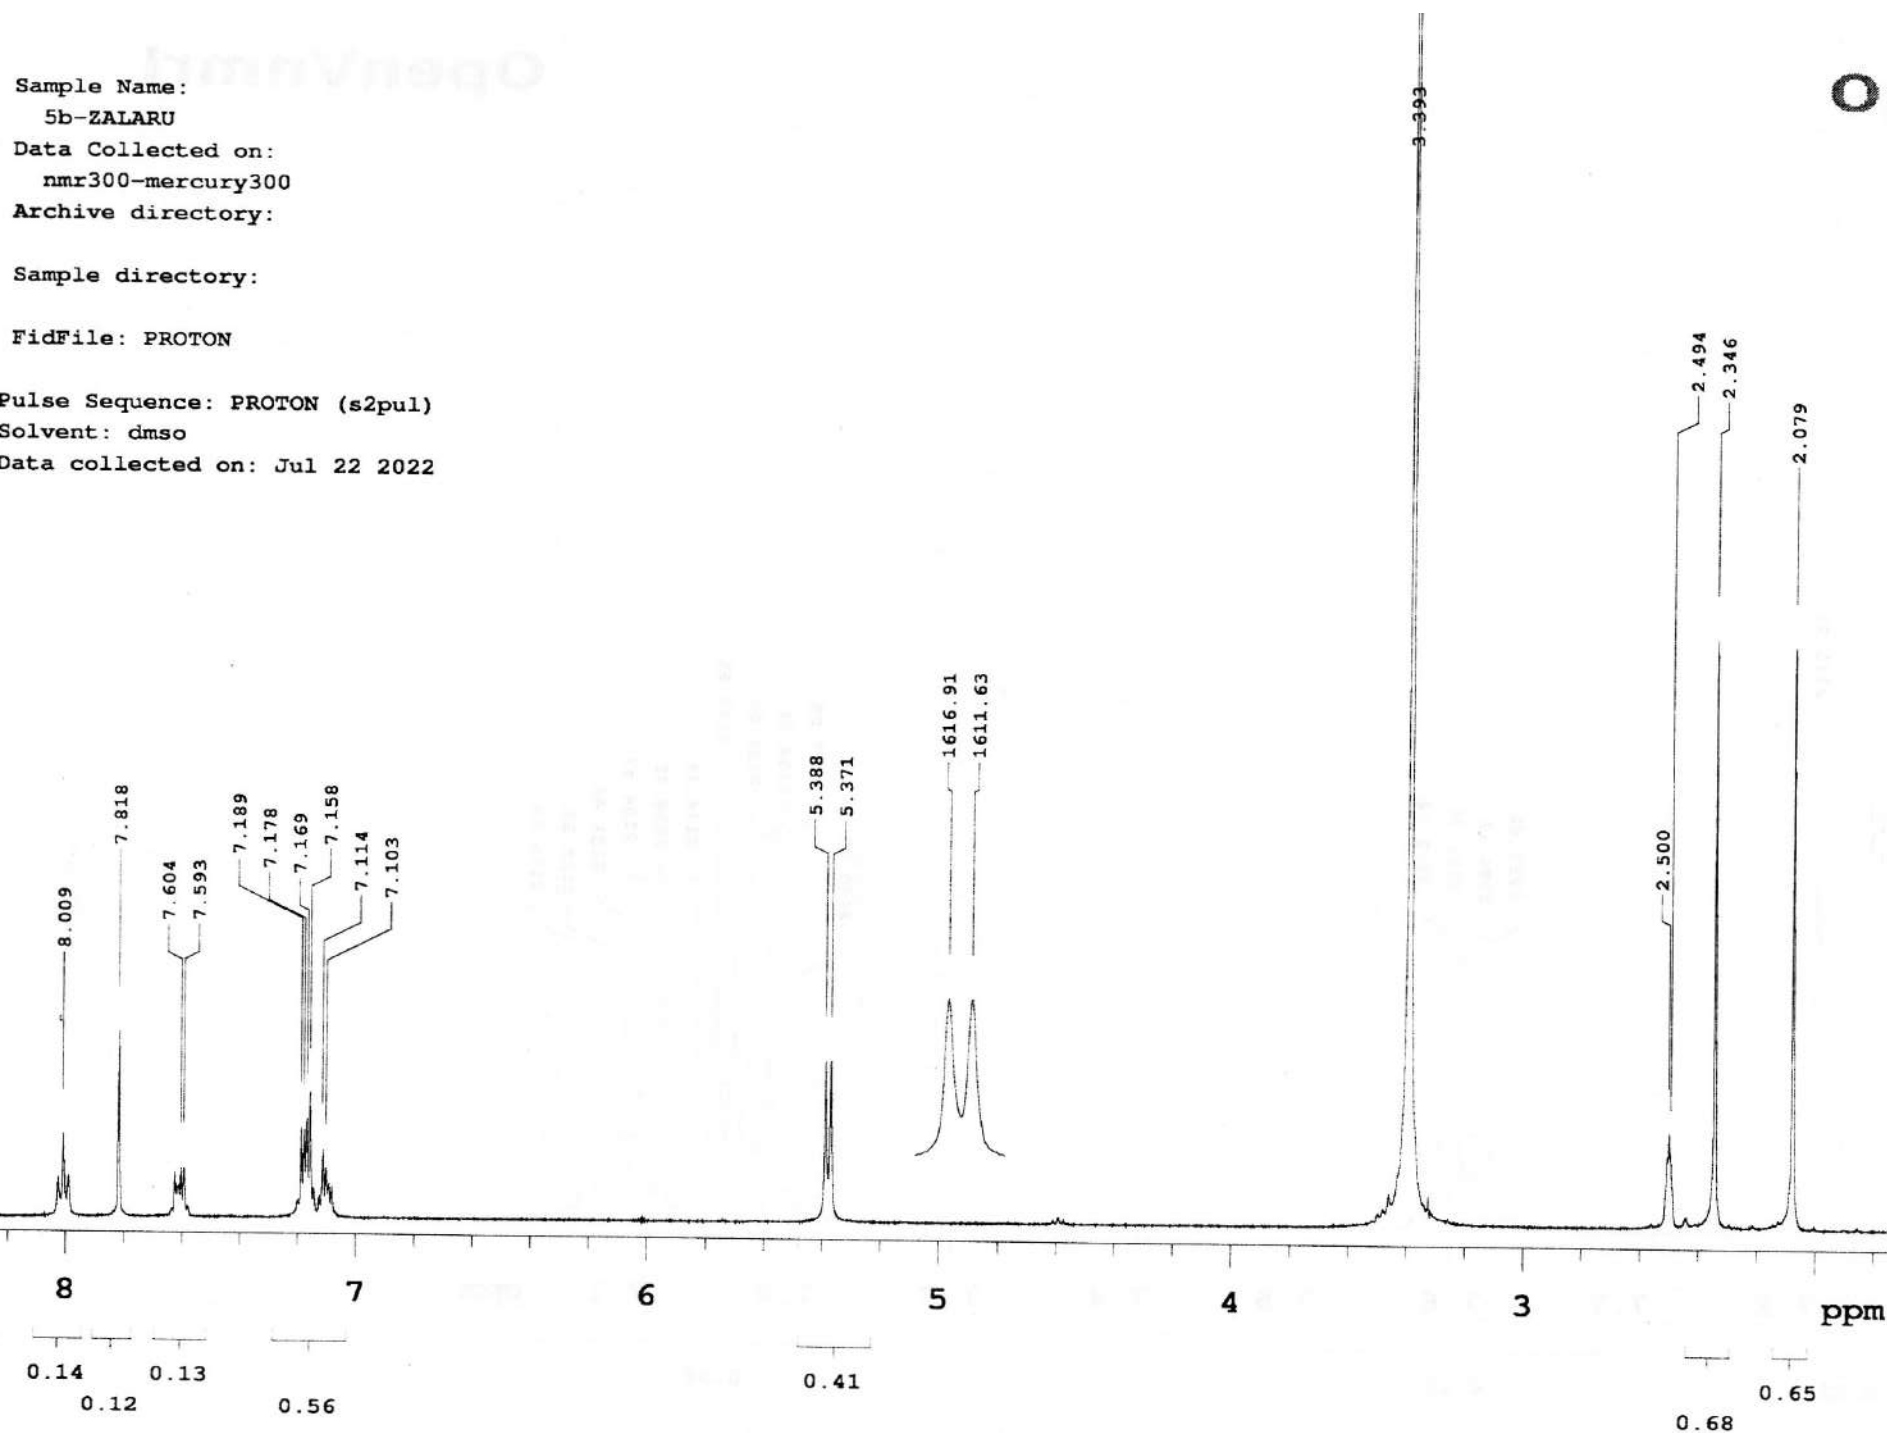

Sample Name: 5b-ZALARU

5b-ZALARU

Data Collected on:

nmr300-mercury300

Archive directory:

Sample directory:

FidFile: PROTON

Pulse Sequence: PROTON (s2pul)

Solvent: dmsd

Data collected on: Jul 22 2022

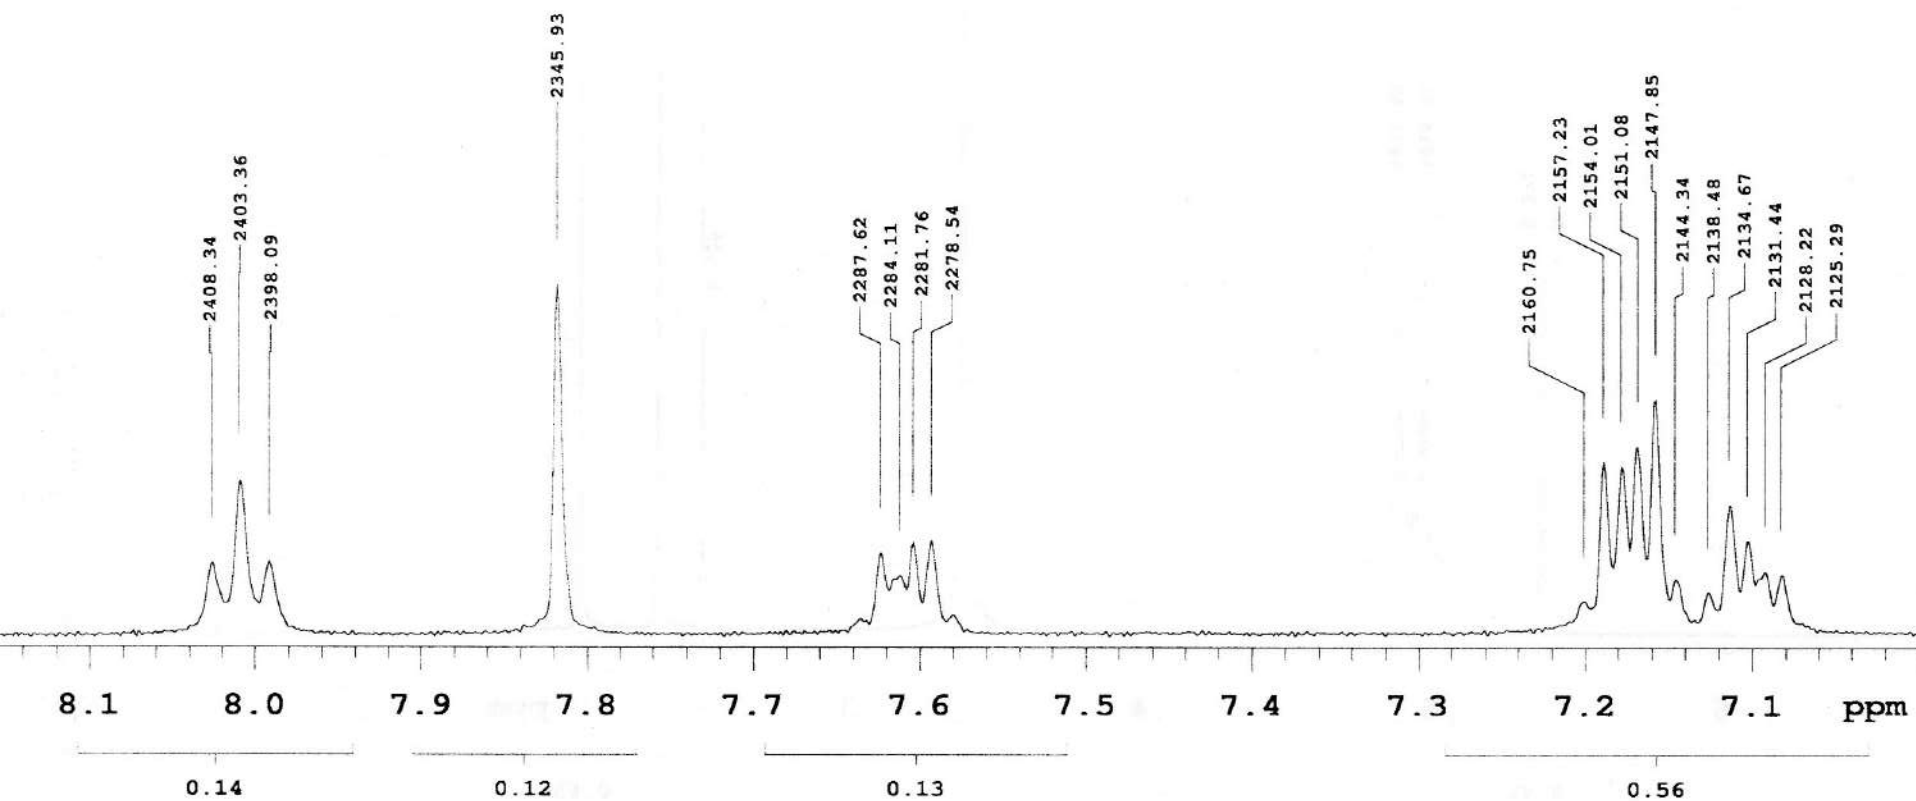

Sample Name:

5c-ZALARU

Data Collected on:

nmr300-mercury300

Archive directory:

/home/vnmr1/vnmrsys/data/07-Analyze/CosticaDraghici

Sample directory:

5c-ZALARU\_22-07-2022

FidFile: 5c-ZALARU-CARBON\_01

Pulse Sequence: CARBON (s2pul)

Solvent: cdcl3

Data collected on: Jul 22 2022

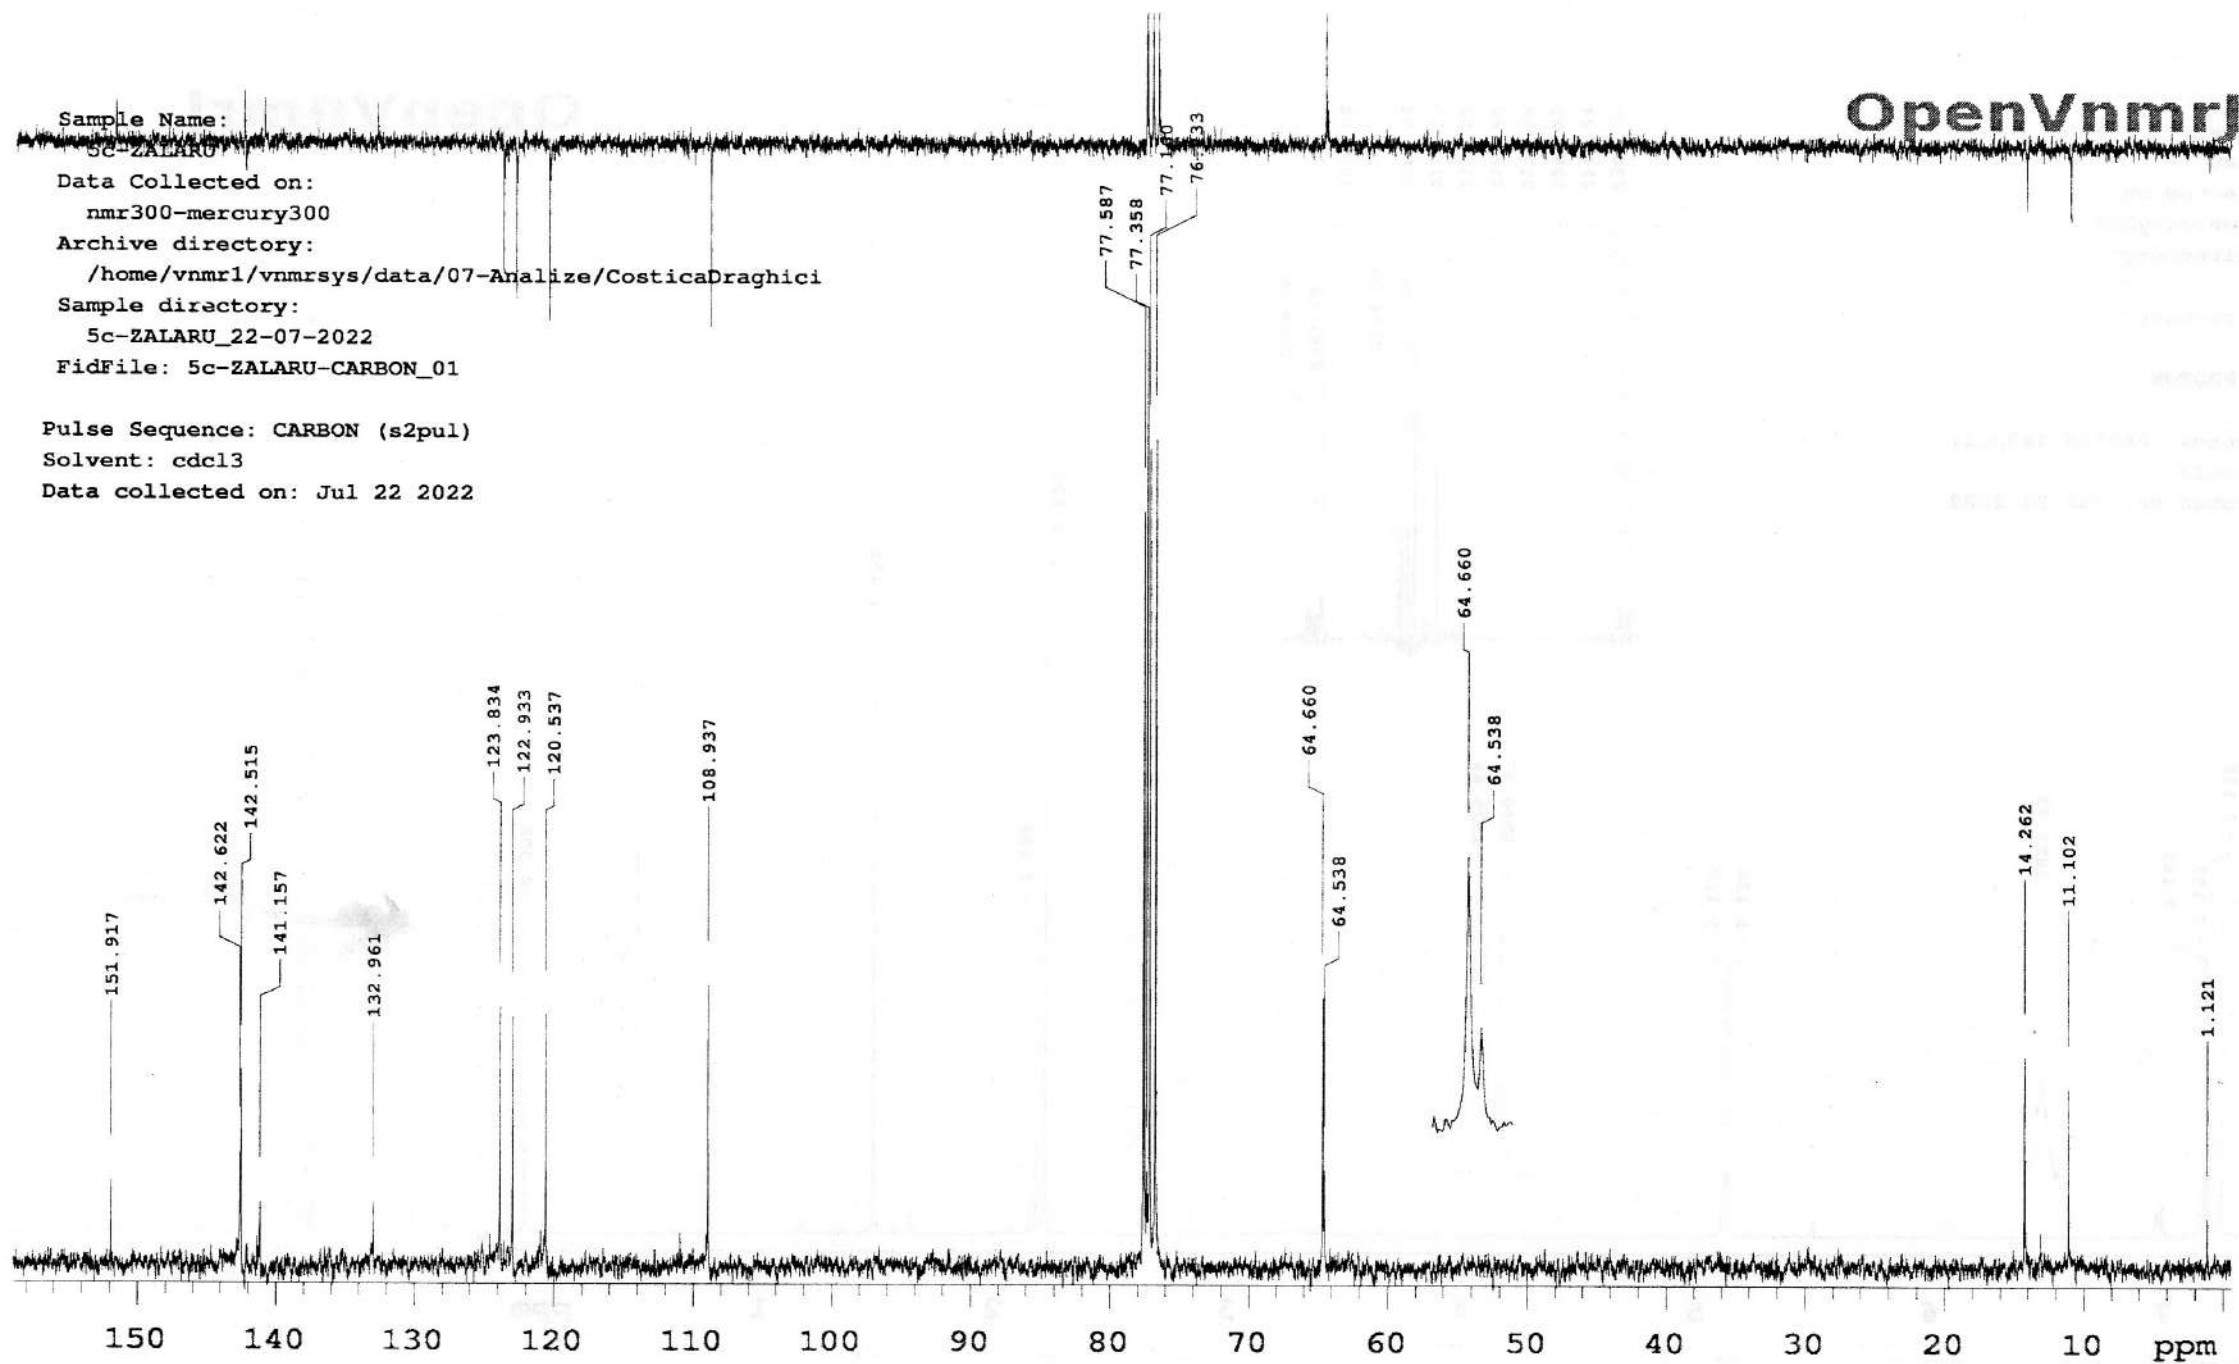

Sample Name:  
5c-ZALARU  
Data Collected on:  
nmr300-mercury300  
Archive directory:

Sample directory:

FidFile: PROTON

Pulse Sequence: PROTON (s2pul)  
Solvent: cdcl3  
Data collected on: Jul 22 2022

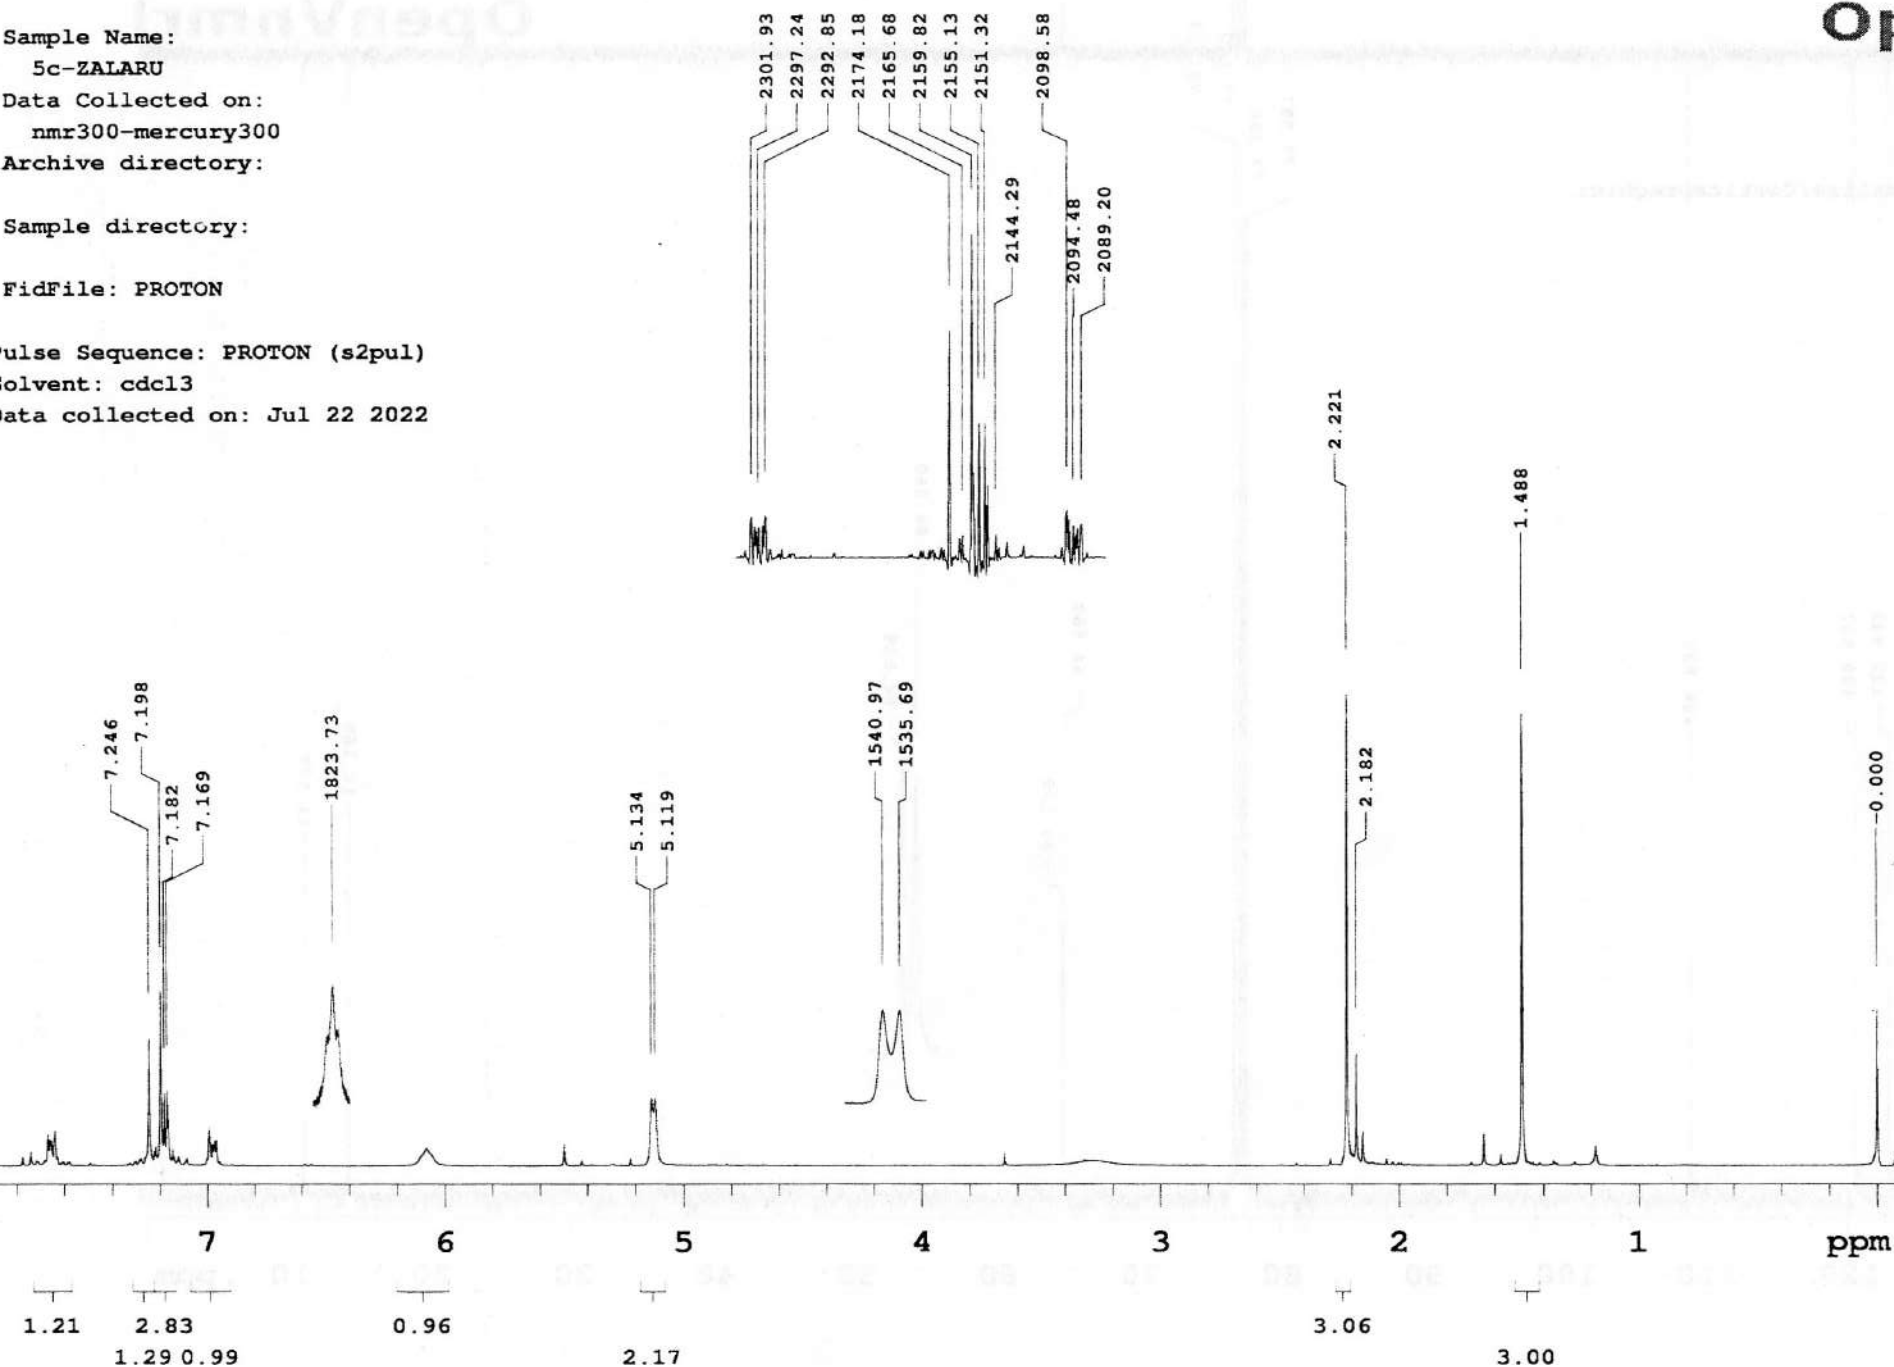

# <sup>1</sup>H-NMR spectra

## N-[(1*H*-pyrazol-1-yl)methyl]-1-amino-2-methyl-1*H*-benzimidazole (**5d**)

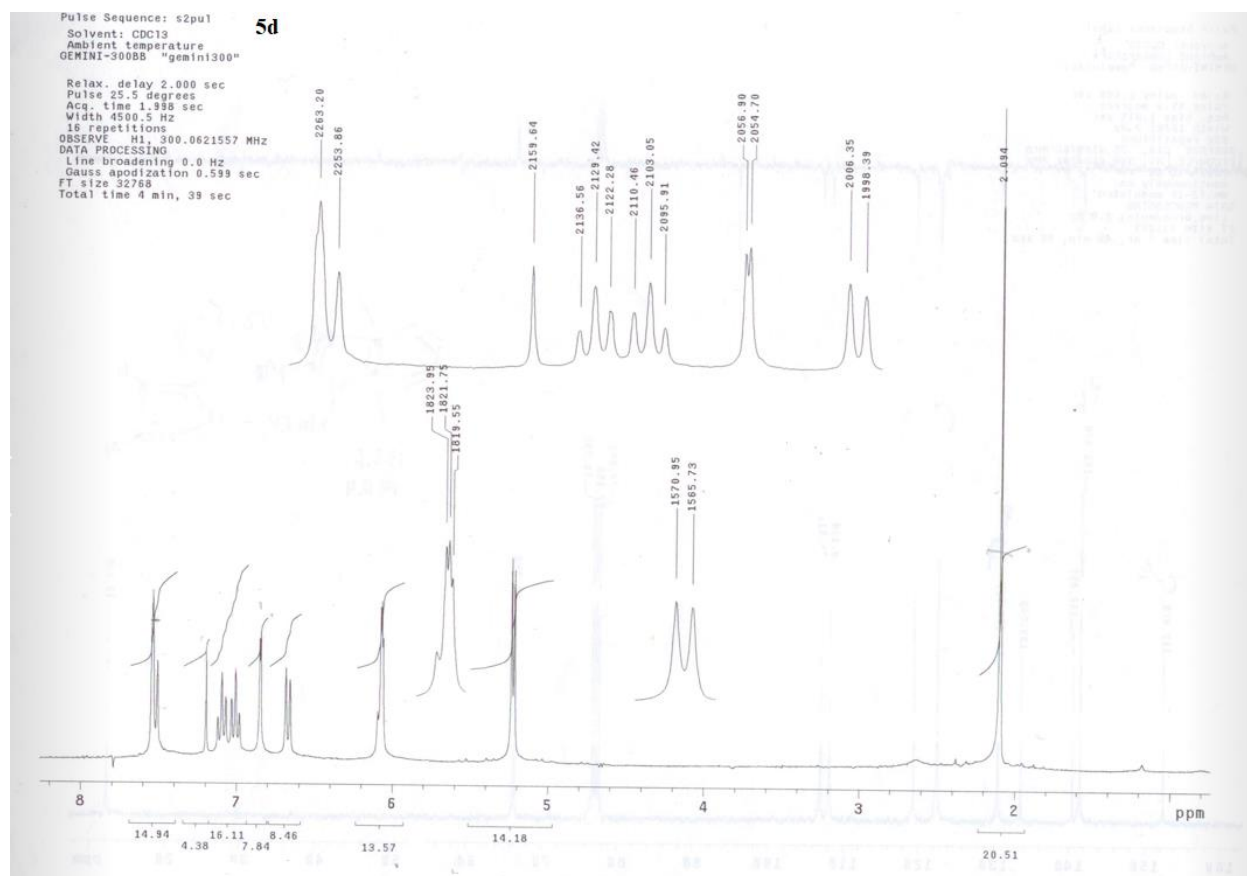

# <sup>1</sup>H-NMR spectra

## N-[(1*H*-pyrazol-1-yl)methyl]1-amino-2-methyl-1*H*-benzimidazole (**5d**)

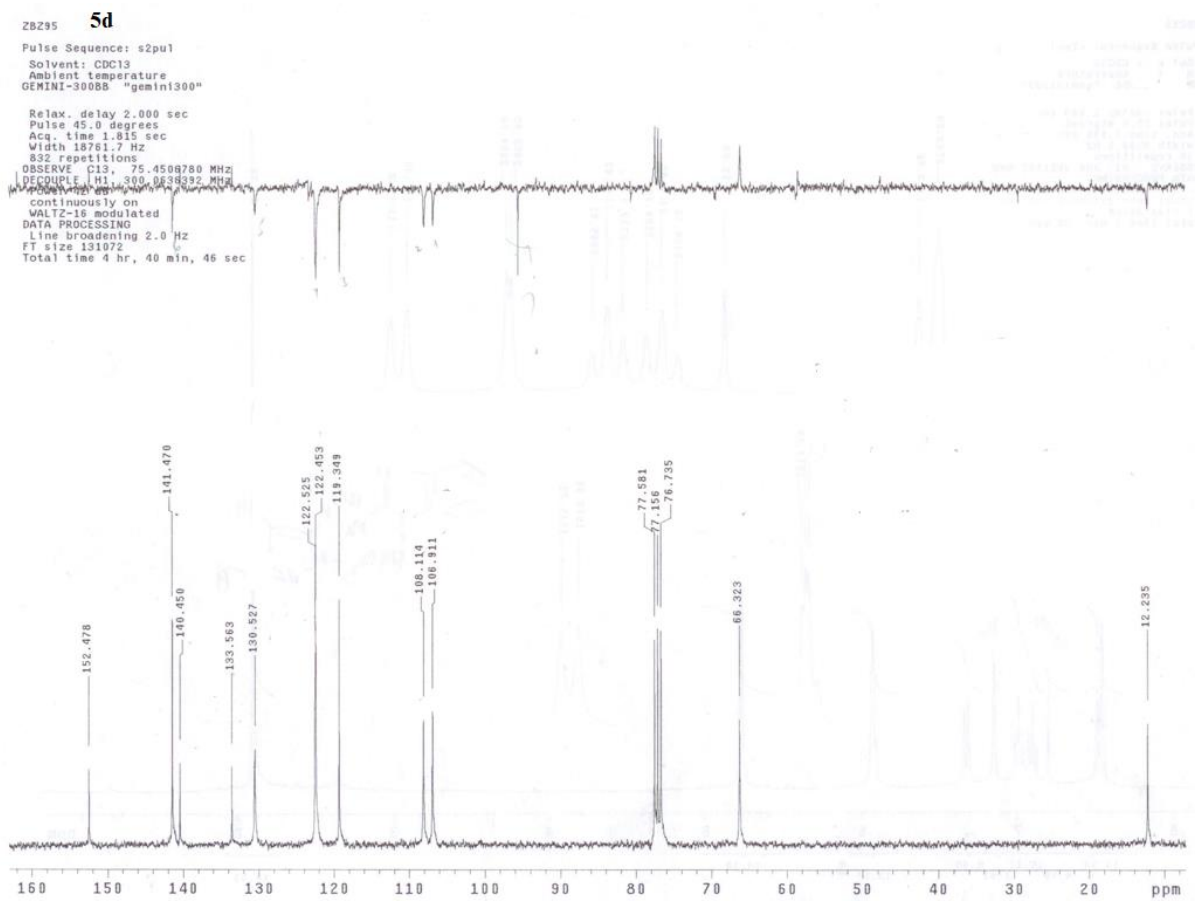



5e

OpenVnmrJ

Sample Name:  
5e-ZALARU  
Data Collected on:  
nmr300-mercury300  
Archive directory:  
/home/vnmr1/vnmrsys/data/07-Analyze/CosticaDraghici  
Sample directory:  
5e-ZALARU\_22-07-2022  
FidFile: 5e-ZALARU-CARBON\_01  
Pulse Sequence: CARBON (s2pul)  
Solvent: cdcl3  
Data collected on: Jul 22 2022

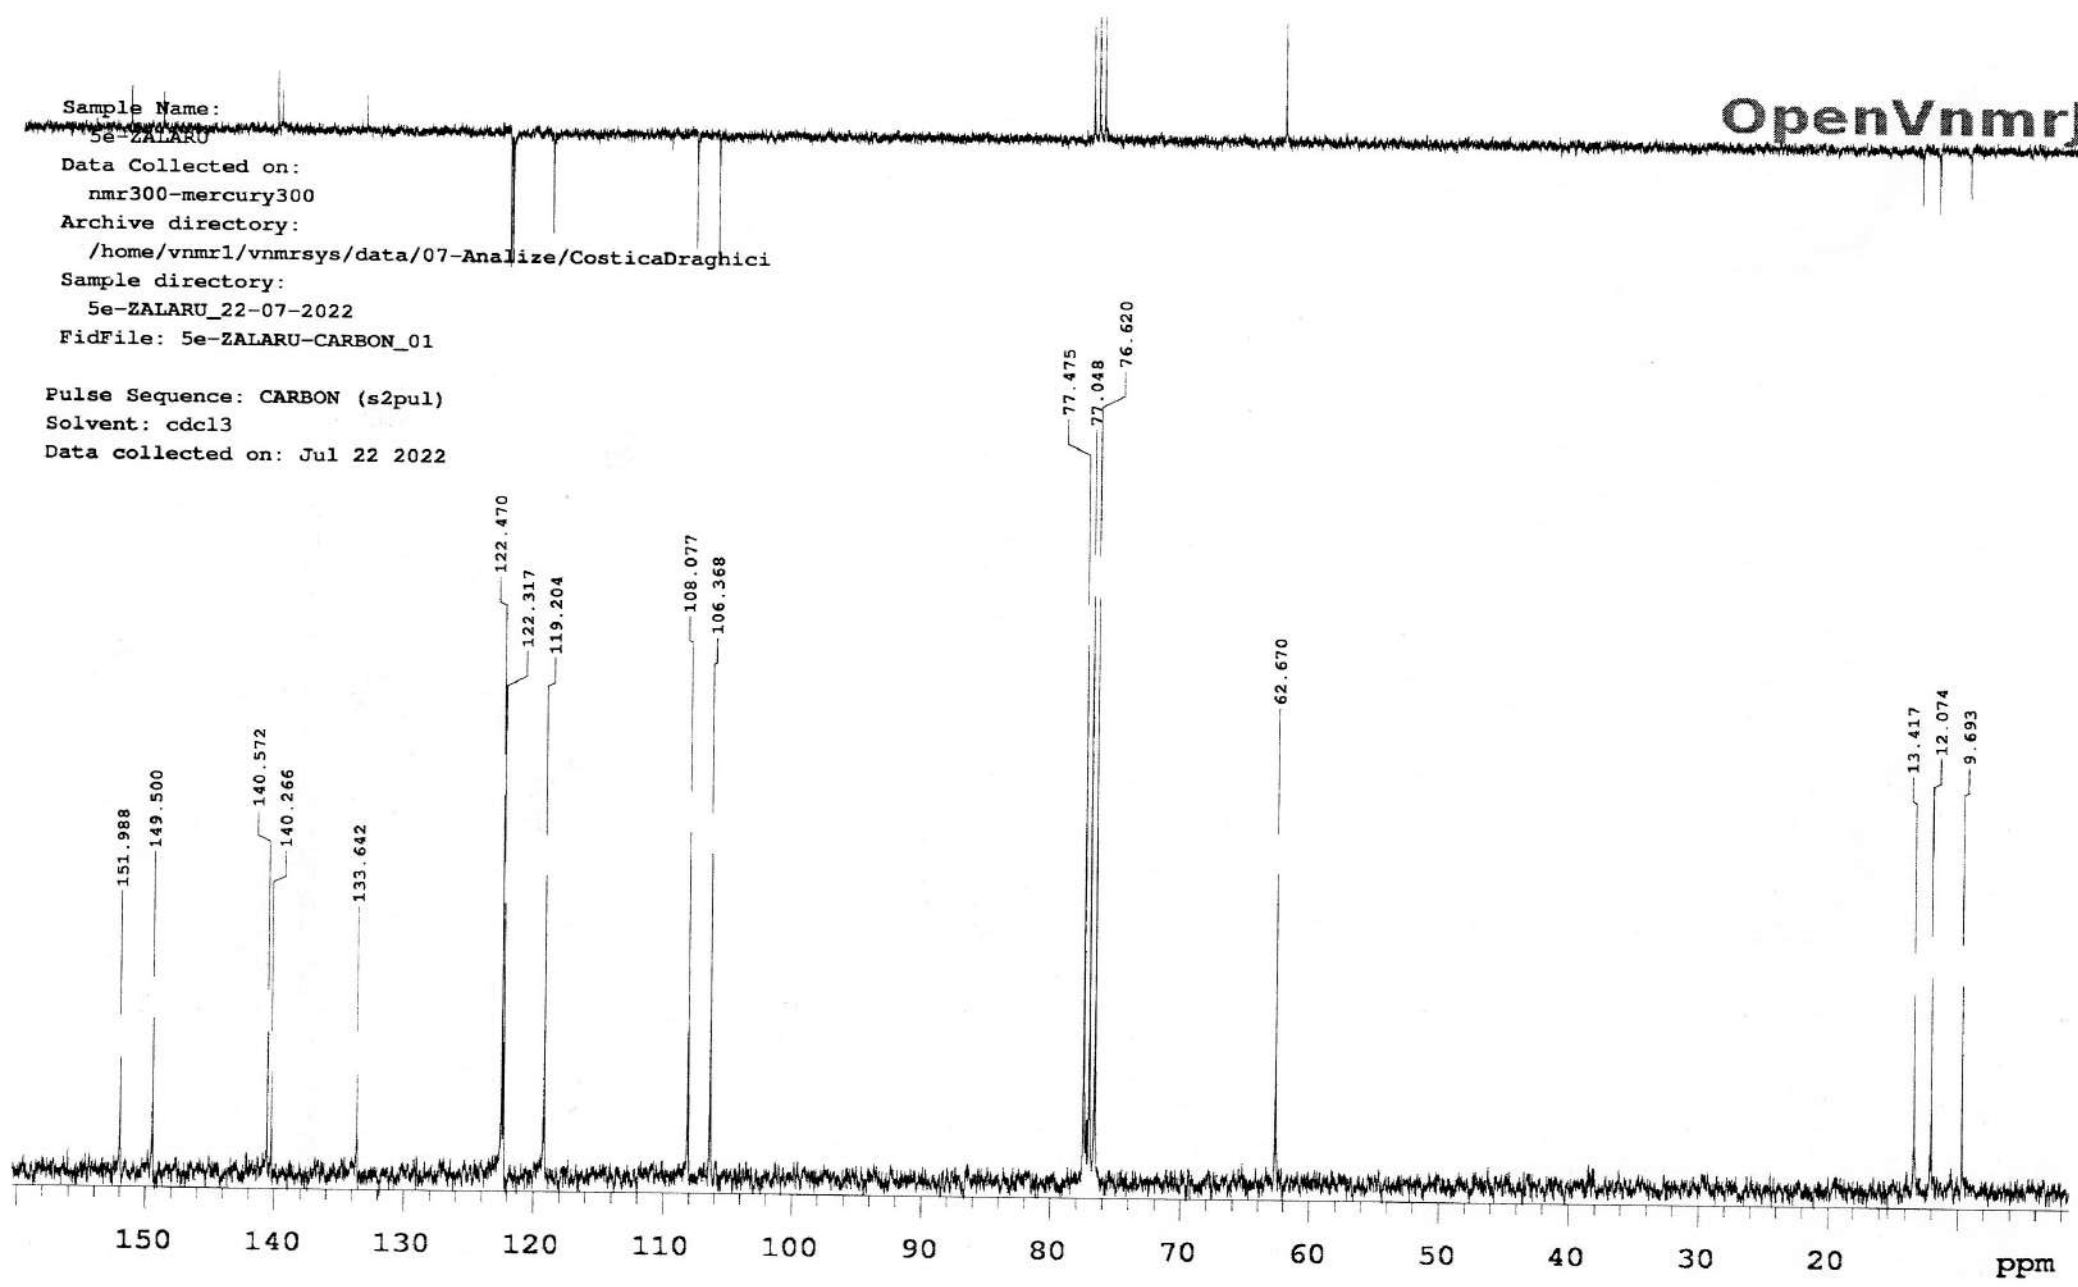

Sample Name:  
5e-ZALARU  
Data Collected on:  
nmr300-mercury300  
Archive directory:

Sample directory:

FidFile: PROTON

Pulse Sequence: PROTON (s2pul)  
Solvent: cdcl3  
Data collected on: Jul 22 2022

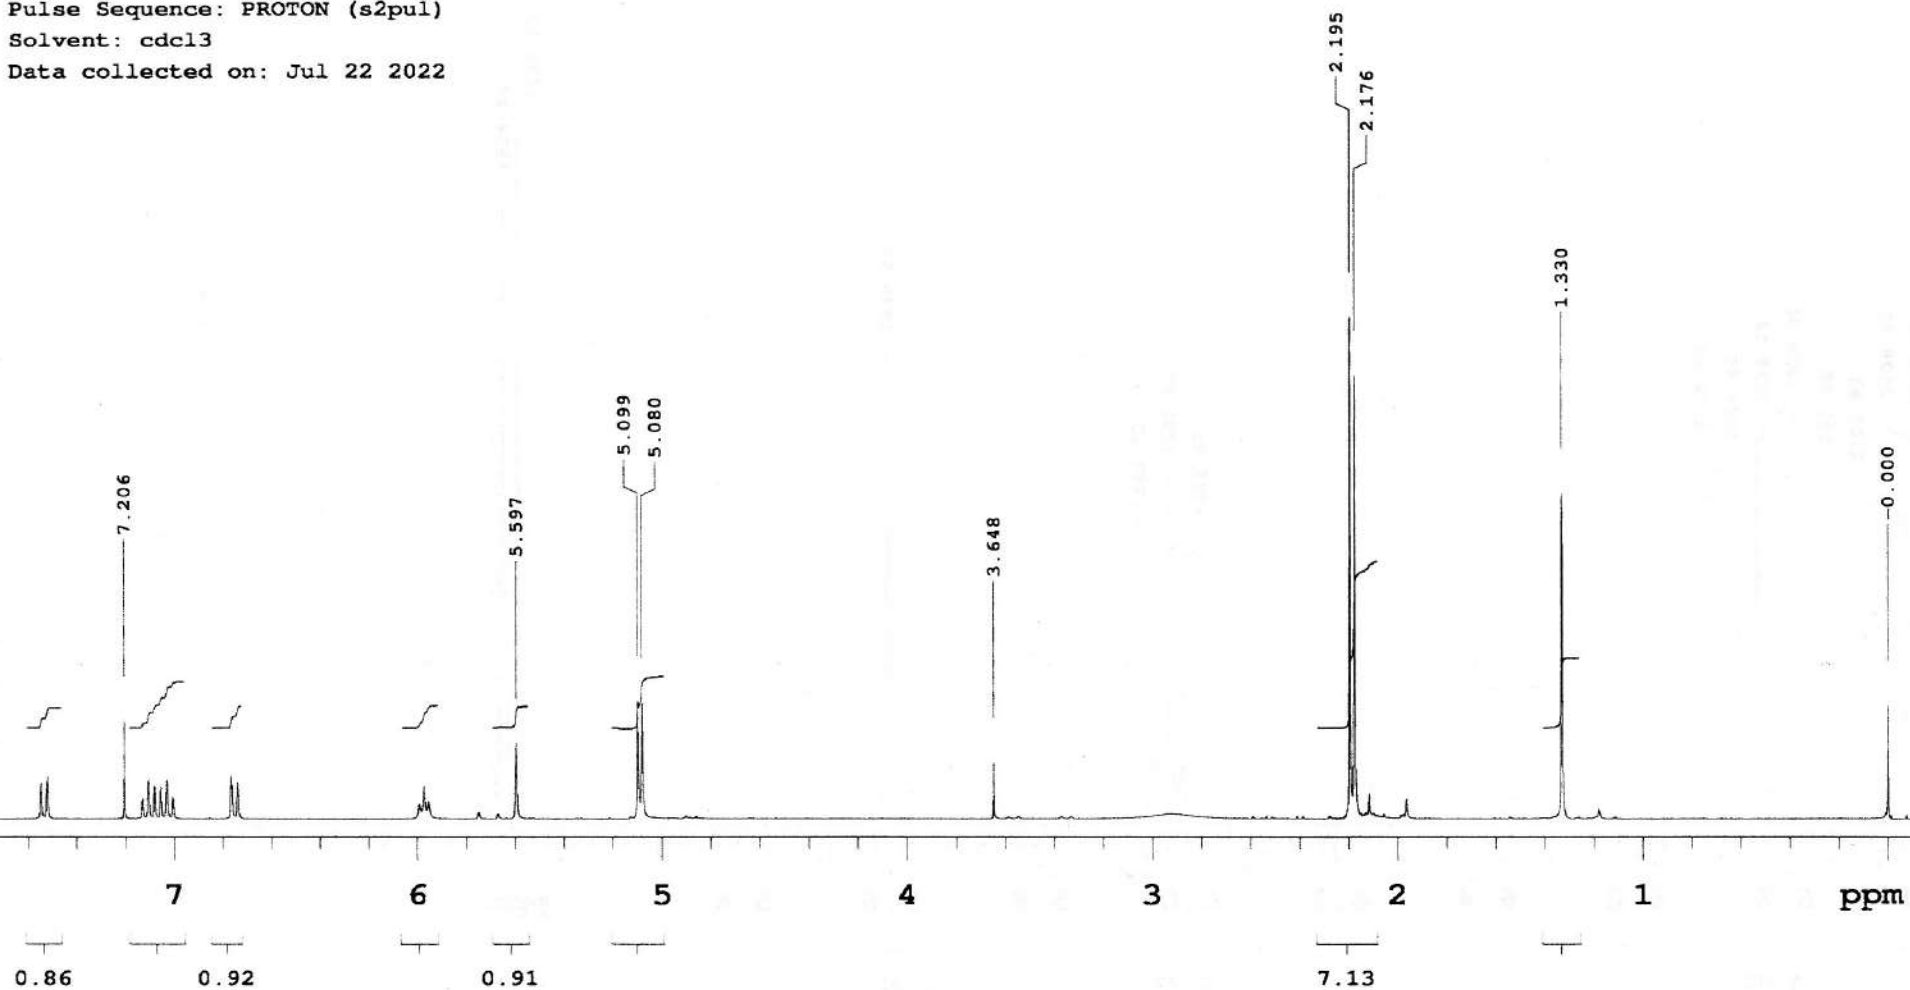

Sample Name:

5e-ZALARU

Data Collected on:

nmr300-mercury300

Archive directory:

/home/vnmr1/vnmrsys/data/07-Analyze/CosticaDraghici

Sample directory:

5e-ZALARU\_22-07-2022

FidFile: 5e-ZALARU-PROTON\_01

Pulse Sequence: PROTON (s2pul)

Solvent: cdcl3

Data collected: 22 07 2022

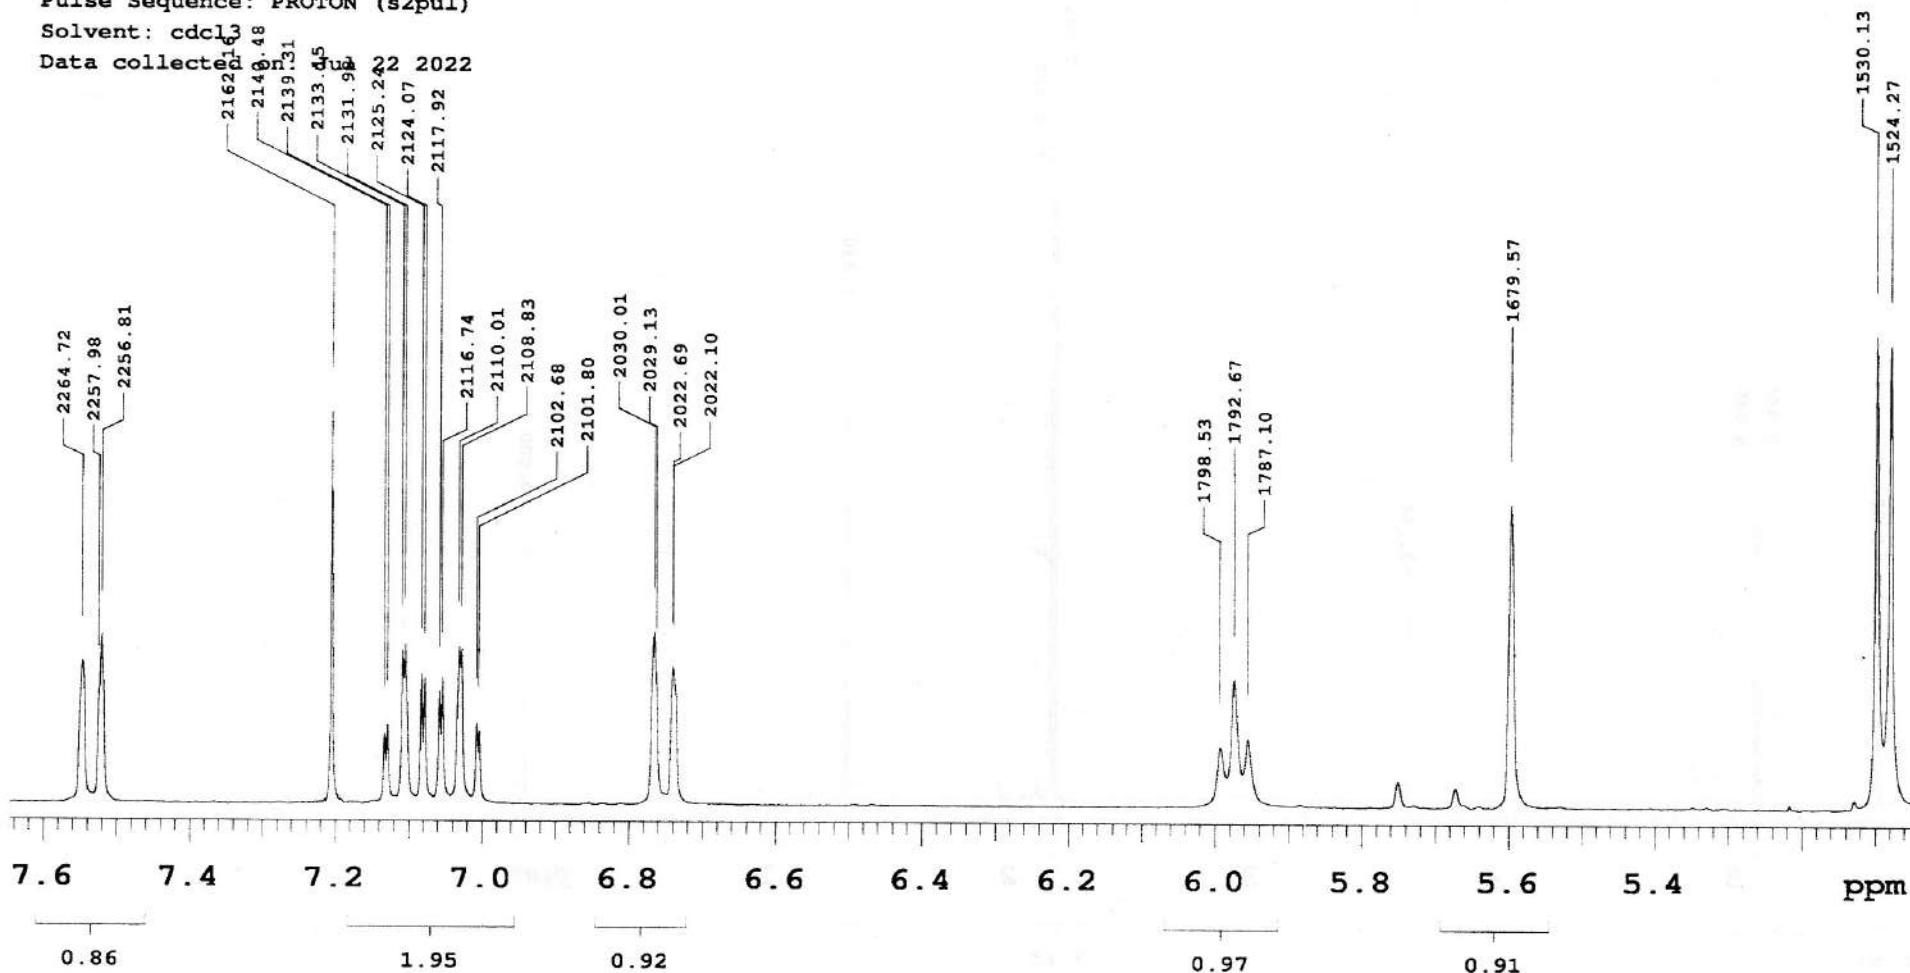

<sup>1</sup>H-NMR spectra

N-[(1*H*-3,5-dimethyl-4-nitropyrazol-1-yl)methyl]-1-amino-2-methyl-1*H*-benzimidazole  
(5*f*)

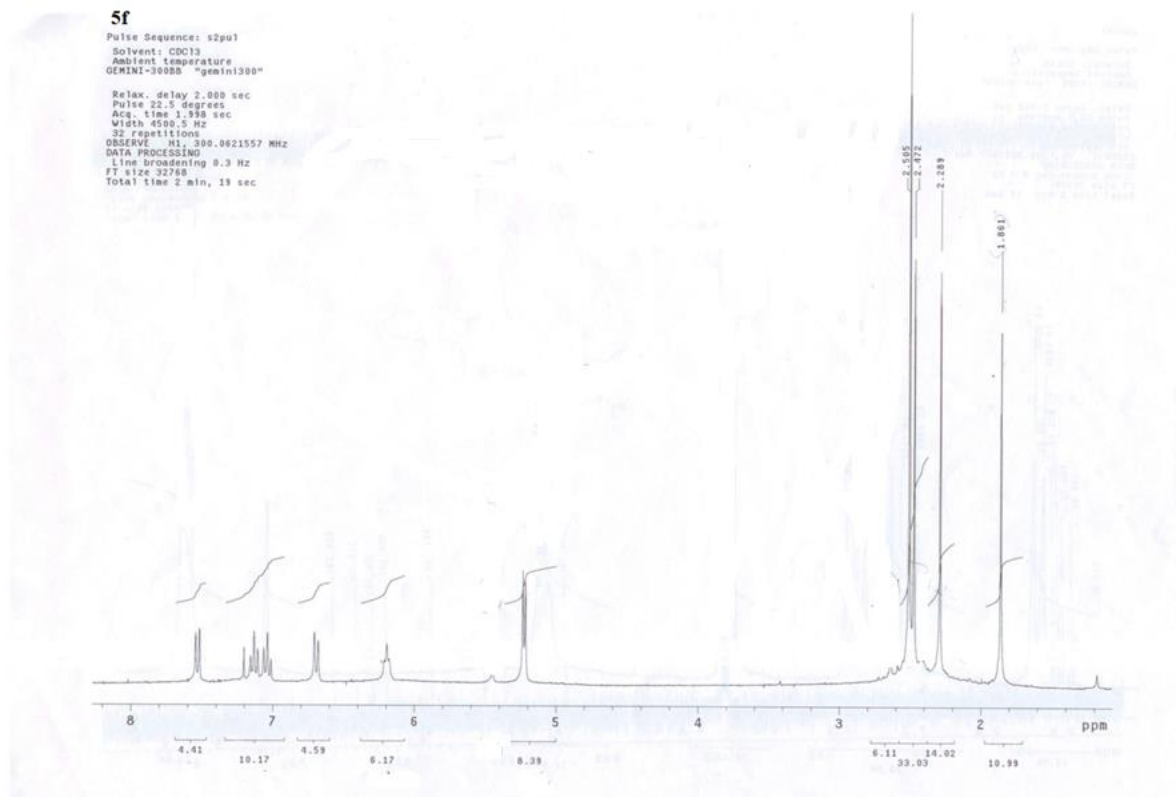

<sup>13</sup>C-NMR spectra

N-[(1*H*-3,5-dimethyl-4-nitropyrazol-1-yl)methyl]-1-amino-2-methyl-1*H*-benzimidazole  
(5*f*)

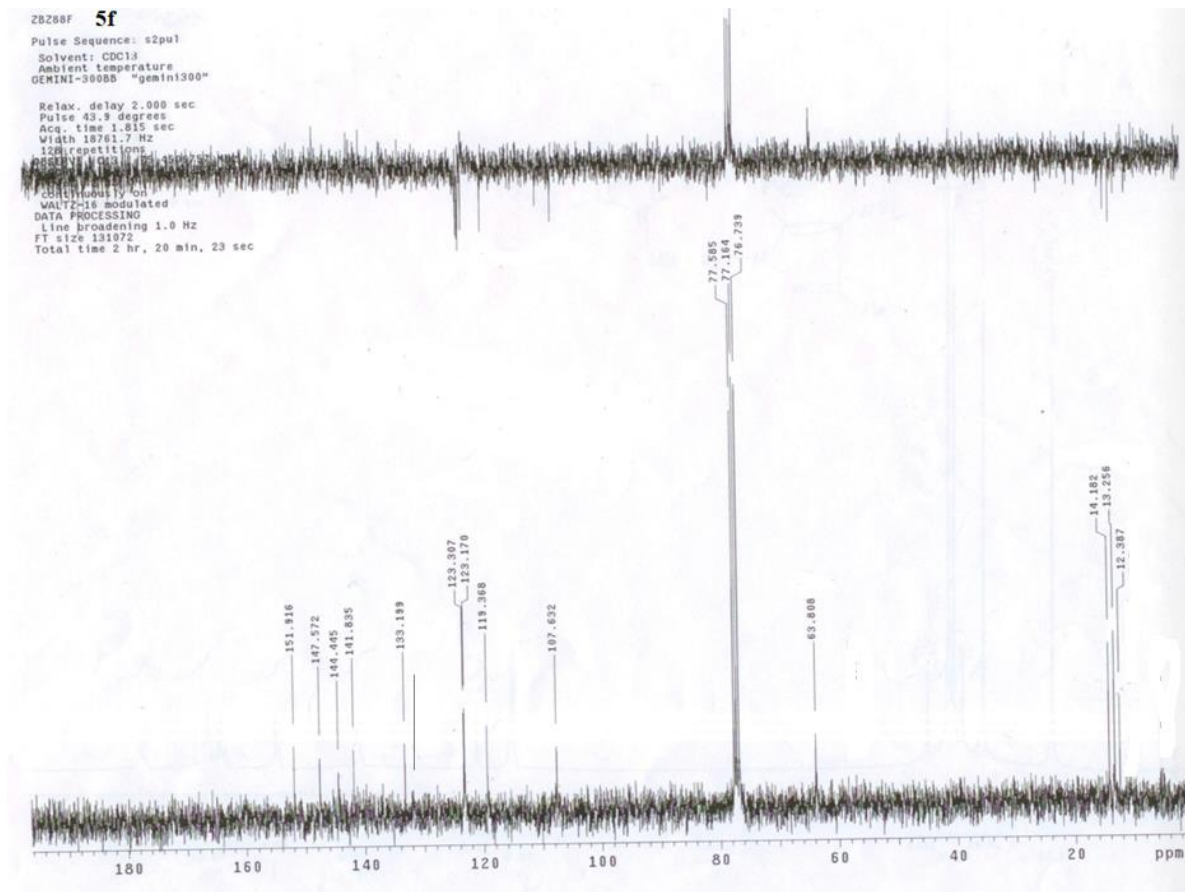

5g

OpenVnmrJ

Sample Name:

CEKPIU

Data Collected on:

nmr300-mercury300

Archive directory:

/home/vnmr1/vnmrsys/data/07-Analyze/CosticaDraghici

Sample directory:

5g-ZALARUWFTDS\_22-07-2022

FidFile: 5g-ZALARUWFTDS-CARBON\_01

Pulse Sequence: CARBON (s2pul)

Solvent: cdcl3

Data collected on: Jul 22 2022

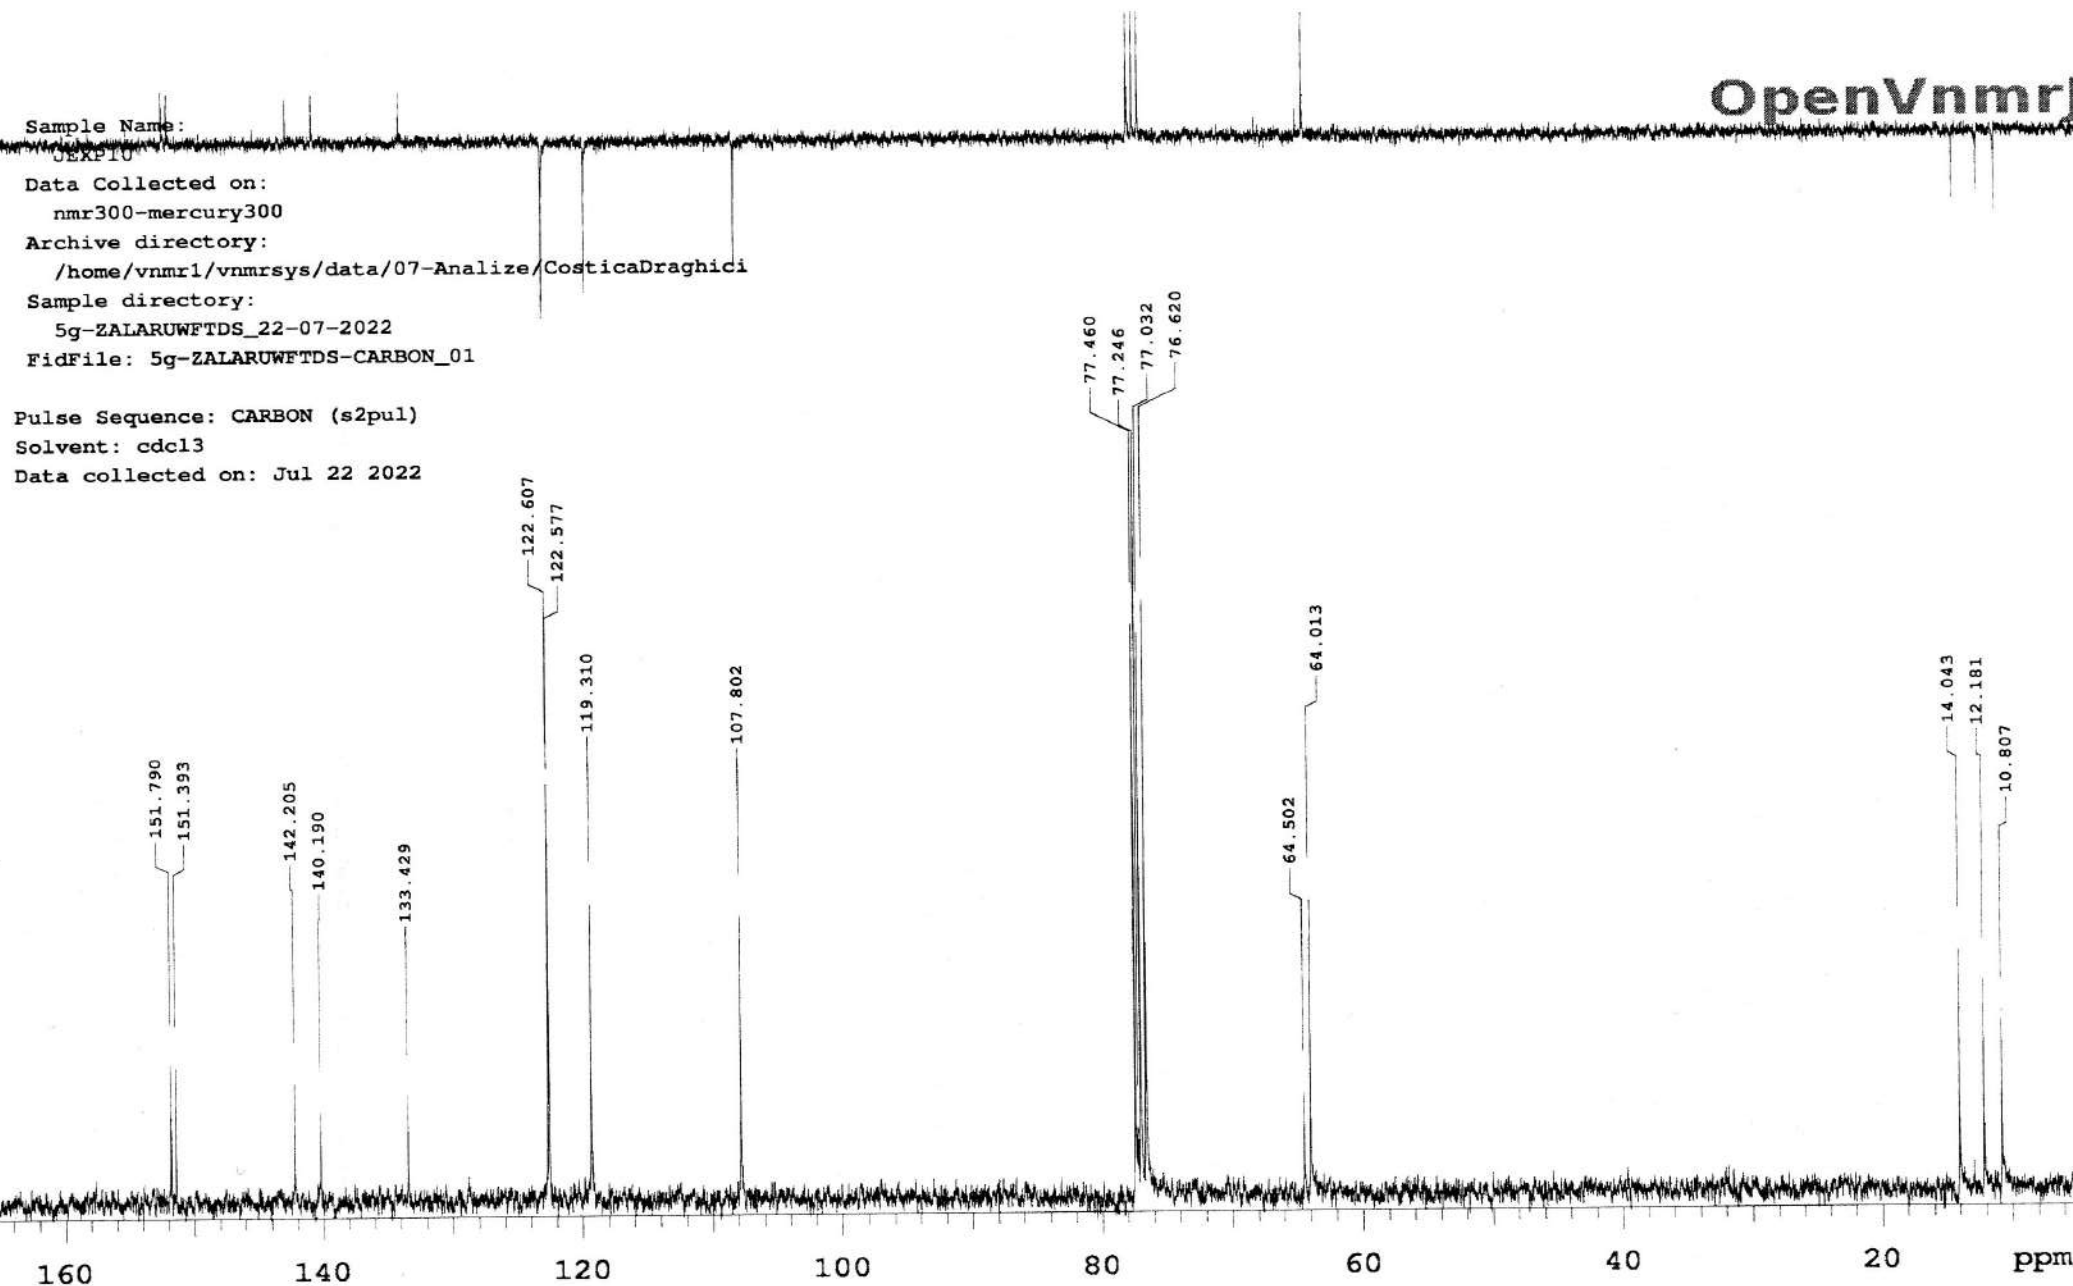

Sample Name:  
5g-ZALARU  
Data Collected on:  
nmr300-mercury300  
Archive directory:

Sample directory:

FidFile: PROTON

Pulse Sequence: PROTON (s2pul)

Solvent: cdcl3

Data collected on: Jul 22 2022

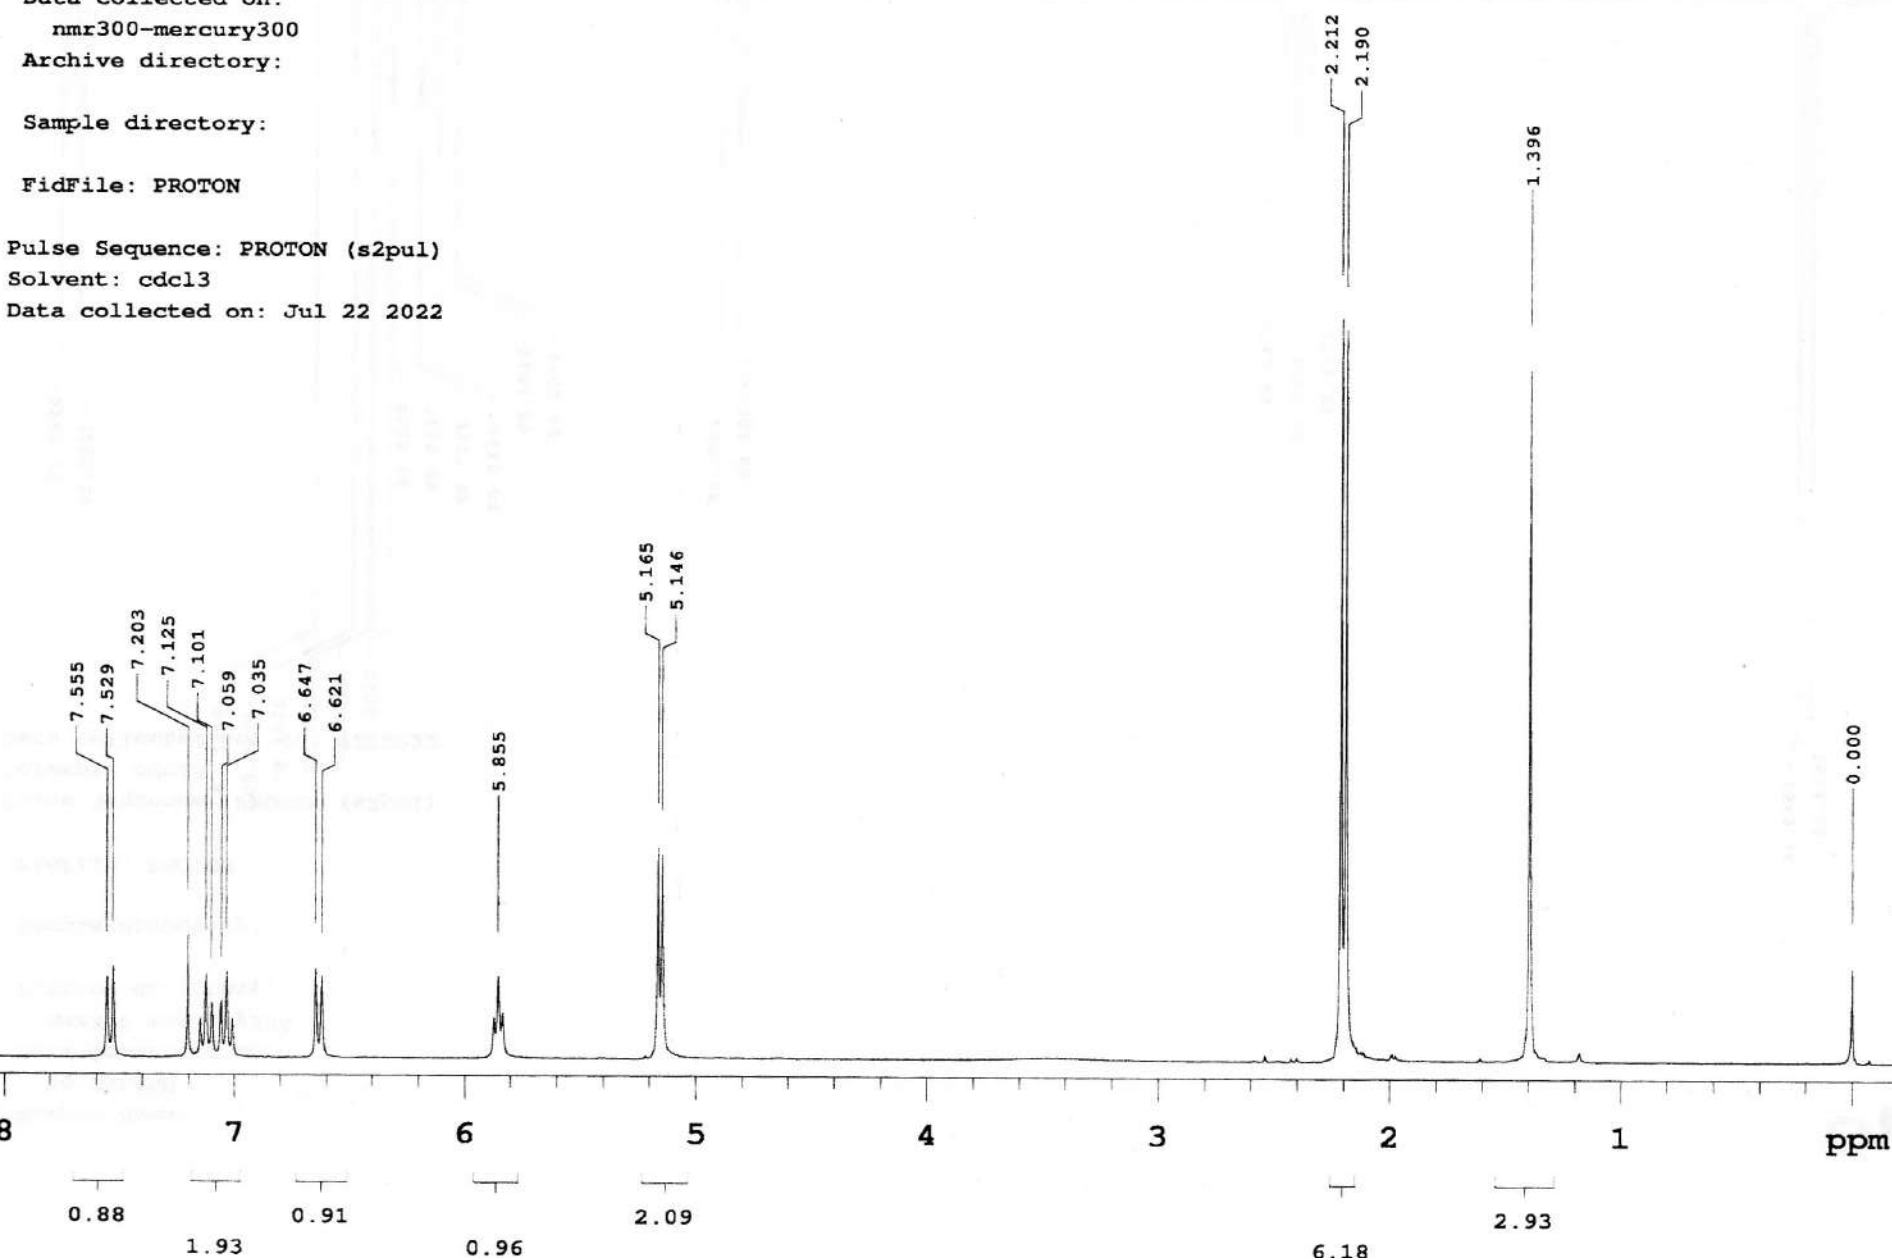

Sample Name:

5g-ZALARU

Data Collected on:

nmr300-mercury300

Archive directory:

Sample directory:

FidFile: PROTON

Pulse Sequence: PROTON (s2pul)

Solvent: cdcl3

Data collected on: 2022

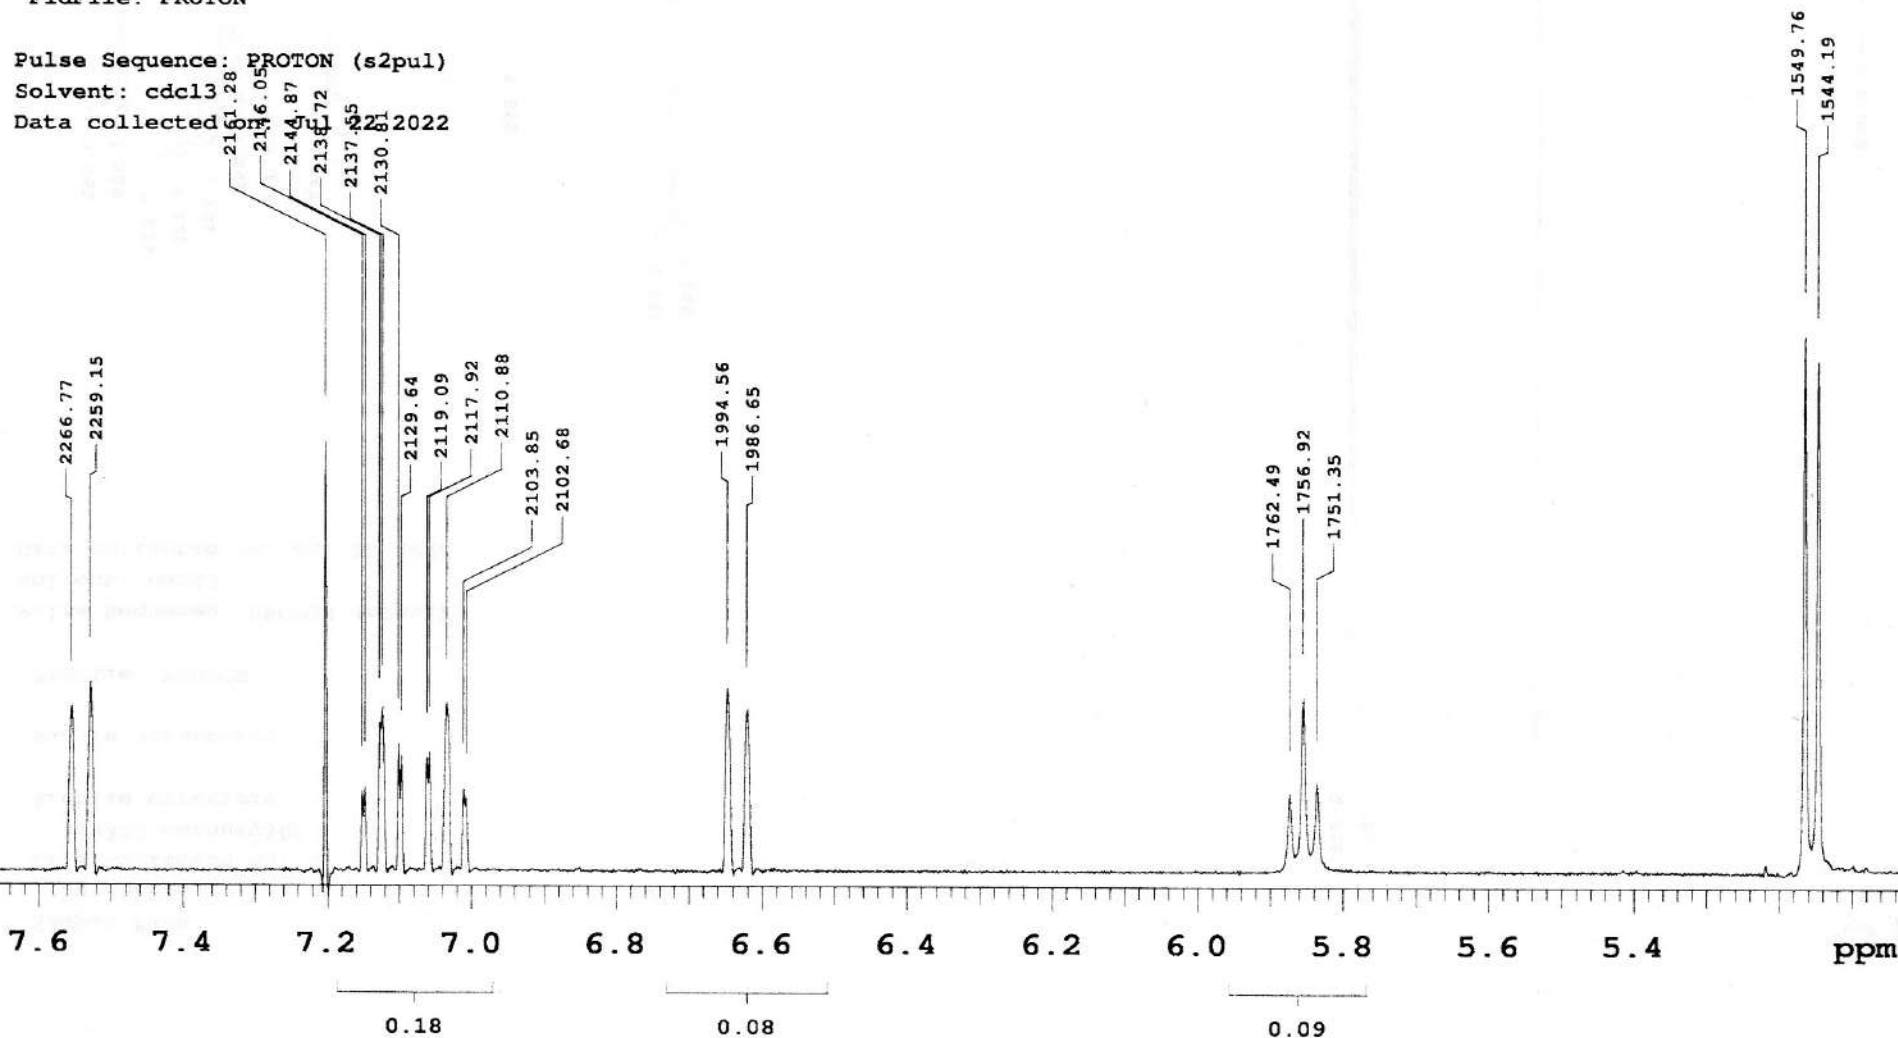

Supplement: s1 [file s1]
